1 A rationally designed mimotope library for profiling of the human IgM repertoire

2

3

4 Anastas Pashov<sup>1,\*</sup>, Velizar Shivarov<sup>2</sup>, Maya Hadzhieva<sup>1</sup>, Victor Kostov<sup>1,3</sup>, Dilyan Ferdinandov<sup>3</sup>, Karen-  
5 Marie Heinz<sup>5</sup>, Shina Pashova<sup>1,4</sup>, Milena Todorova<sup>1</sup>, Tchavdar Vassilev<sup>1</sup>, Thomas Kieber-Emmons<sup>6</sup>,  
6 Leonardo A. Meza-Zepeda<sup>5</sup>, Eivind Hovig<sup>5</sup>

7

8 <sup>1</sup>Department of Immunology, Stephan Angeloff Institute of Microbiology, BAS, Sofia, Bulgaria

9 <sup>2</sup>Laboratory of Clinical Immunology and Department of Clinical Hematology, Sofamed University  
10 Hospital, Sofia, Bulgaria; ORCID: 0000-0001-5362-7999

11 <sup>3</sup>Neurosurgery Clinic, St. Ivan Rilsky Hospital, MU, Sofia, Bulgaria

12 <sup>4</sup>Department of Molecular Immunology, Institute of Biology and Immunology of Reproduction, BAS,  
13 Sofia, Bulgaria

14 <sup>5</sup>Department of Tumor Immunology, Oslo University Hospital, Oslo, Norway

15 <sup>6</sup>Winthrop P. Rockefeller Cancer Research Center, UAMS, Little Rock, AR, USA

16

17

18 \*Corresponding author.

19 **Mailing Address:**

20 Institute of Microbiology, BAS,

21 Acad. G Bonchev St, block 26

22 Sofia 1113, Bulgaria

23 **E-mail:** [a\\_pashov@microbio.bas.bg](mailto:a_pashov@microbio.bas.bg) (AP)

24 **Phone:** +359 897 944628

25

26

27

28

29 **Running title:** A rationally designed mimotope library for IgM igome studies

30

31

1 **Abstract**

2 Specific antibody reactivities are routinely used as biomarkers but the use of antibody repertoire profiles  
3 is still awaiting recognition. Here we suggest to expedite the adoption of this class of system level  
4 biomarkers by rationally designing a peptide array as an efficient probe for an appropriately chosen  
5 repertoire compartment. Most IgM antibodies are characterized by few somatic mutations,  
6 polyspecificity and physiological autoreactivity with housekeeping function. Previously, probing this  
7 repertoire with a set of immunodominant self-proteins provided only coarse information on repertoire  
8 profiles. In contrast, here we describe the rational selection of a peptide mimotope set, appropriately  
9 sized as a potential diagnostic, that also represents optimally the diversity of the human public IgM  
10 reactivities. A 7-mer random peptide phage display library was panned on pooled human IgM. Next  
11 generation sequencing of the selected phage yielded a non-exhaustive set of 224087 mimotopes which  
12 clustered in 790 sequence clusters. A set of 594 mimotopes, representative of the most significant  
13 clusters, was used to demonstrate that this approach samples symmetrically the space of IgM  
14 reactivities. When probed with diverse patients' sera in an oriented peptide array, this set produced a  
15 higher and more dynamic signal as compared to 1) random peptides, 2) random peptides purged of  
16 mimotope-like sequences and 3) mimotopes from a small subset of clusters. In this respect, the  
17 representative library is an optimized probe of the human IgM diversity. Proof of principle predictors for  
18 randomly selected diagnoses based on the optimized library demonstrated that it contains more than  
19  $10^{70}$  different profiles with the capacity to correlate with diverse pathologies. Thus, an optimized small  
20 library of IgM mimotopes is found to address very efficiently the dynamic diversity of the human IgM  
21 repertoire providing informationally dense and structurally interpretable IgM reactivity profiles.

22

23

24

1 **Author Summary**

2 The presence in the blood of antibodies specific for a particular infectious agent is used routinely as a  
3 diagnostic tool. The overall profile of available antibody reactivities (or their repertoire) in an individual  
4 has been studied much less. As an omics approach to immunity it can be a rich source of information  
5 about the system beyond just the individual history of antigenic exposure. Using a subset of antibodies –  
6 IgM, which are involved also in housekeeping functions like removing dead cells, and bacteriophage  
7 based techniques for selection of specific peptides, we managed to define a non-exhaustive set of  
8 224087 peptides recognized by IgM antibodies present in most individuals. They were found to group  
9 naturally in 790 structural groups. Limiting these to the most outstanding 594 groups, we used one  
10 representative from each group to assemble a reasonably small set of peptides that extracts the  
11 maximum information from the antibody repertoire at a minimum cost per test. We demonstrate, that  
12 this representative peptide library is a better probe of the human IgM diversity than comparably sized  
13 libraries constructed on other principles. The optimized library contains more than  $10^{70}$  different  
14 potentially profiles useful for the diagnosis, prognosis or monitoring of inflammatory and infectious  
15 conditions, tumors, neurodegenerative diseases, etc.

16

17

1

## 2 **Introduction**

3 The repertoire of human IgM contains a considerable proportion of moderately autoreactive antibodies  
4 characterized by low intrinsic affinity/ low specificity, functioning as a first line of defense [1], as  
5 scavengers of senescent cells and debris [2-6], and even in tumor surveillance [7]. It is becoming  
6 increasingly clear that the human antibody repertoire has an organization similar to that of its murine  
7 counterpart [8-12]. About one fourth of the murine splenic B lymphocytes that respond to  
8 lipopolysaccharide have B cell receptors which are moderately autoreactive. Affected very little by  
9 somatic mutations and follicular evolution, the physiological self-reactivities largely overlap with  
10 germline-encoded polyspecific antibodies [13-15]. Eighty percent of murine serum IgM falls in this  
11 category and is referred to as natural antibodies (nAbs) [16,17]. Apart from the polyspecific splenic B  
12 cells, the source of nAbs in mice seems to be mostly a population of B1-related IgM<sup>+</sup> plasma cells  
13 residing in a unique IL-5 dependent bone marrow niche [18].

14 The IgM antibody repertoire is an insufficiently explored source of biomarker profiles. IgM antibodies  
15 appear early in the course of an infection. However, they fall relatively fast, even after restimulation,  
16 providing a dynamic signal. By interacting with structures of self and carrying housekeeping tasks, this  
17 part of the antibody repertoire reacts swiftly to and reflects changes in the internal environment.  
18 Consequently, IgM antibodies have gained interest as biomarkers of physiological or pathological  
19 processes [19-23], but remain underused as immunodiagnostics, although their interactions with sets of  
20 antigens have been studied in a range of platforms [19,22-25].

21 The study of the IgM repertoire might be expected to give information about interactions that occur  
22 mostly in the blood and the tissues with fenestrated vessels since, unlike IgG, IgM cannot easily cross  
23 the normal vascular wall. Yet, IgM tissue deposits are a common finding in diverse inflammatory  
24 conditions [26-28] and especially in the disorganized vasculature of the tumors, where they are a key

1 element of the innate immune surveillance mechanism [7,29,30]. Changes in the IgM repertoire further  
2 reflect B cell function affected by antigenic, danger and inflammatory signals, but also by anatomical  
3 changes leading to vascular permeability or disruption. Thus, IgM repertoire monitoring has the  
4 potential to provide clinically relevant information about most of the pathologies involving inflammation  
5 and vascular remodeling, as well as all types of cancer.

6 Our working hypothesis is that an essential part of the human IgM repertoire involved in homeostasis  
7 can be probed by a set of mimotopes, the size of which can be tailored to the diagnostic goals by  
8 optimization. The existing approaches for immunosignature [31,32] or immunomic [33] analysis of the  
9 immunoglobulin repertoires focus mostly on IgG and have used arrays of either  $10^2$  proteins or  $10^4$ - $10^5$   
10 random peptides. The IgM repertoire has been previously probed by protein arrays [34] containing a  
11 biologically determined representative set of autoantigens which is a structurally coarse approach. We  
12 set out to explore the feasibility of a method that, similar to the self-protein “homunculus” arrays,  
13 targets a small set of rationally selected probes, but also preserves the structural interpretability of  
14 peptides in a format applicable for routine diagnostics.

15

## 1 Results

### 2 Selection of 7-mer mimotopes

3 We chose to pan a commercially available 7-mer random peptide phage display library of diversity  $10^9$ .  
4 Thus, the size of the mimotopes would be in the range of the shorter linear B cell epitopes in the IEDB  
5 database (<http://www.iedb.org/>). At the same time, the almost complete diversity of sequences of that  
6 length could be interrogated. As a repertoire template we used an experimental preparation of human  
7 immunoglobulins for intravenous use enriched in IgM representing a pool of the repertoire of approx.  
8 10 000 healthy donors. The phage eluted from the IgM repertoire were adsorbed on a monoclonal IgM  
9 to filter out phage binding to the constant regions, and thereby focus only on the mimotopes (Fig. 1).  
10 The peptide inserts were amplified and deep sequenced using the approach described by Matochko et  
11 al. (2012) [35]. Two separate experiments starting with 20% of the original phage library were  
12 performed (experiments A and B), while in a third one (C), a preamplified 20% sample of the original  
13 phage library was used. The yield was 688 860 (experiment A), 518 533 (experiment B) and 131 475  
14 (experiment C) unique reads. Based on the distribution of the reads by copy number in the selections  
15 from the native and preamplified library two thresholds were determined – 2 and 11 copies, and the  
16 reads within these limits were considered further (see Suppl. Methods).

17 **Figure 1.** Schematic representation of the deep panning experiment.

18

### 19 Sequence properties of the mimotope clusters

20 The overall amino acids residues frequencies (AAF) in the mimotopes selected from the phage library  
21 showed a skewing in favor of G,W,A,R,T,H,M,P,Q and against C,F,N,Y,I,L and S (Fig. 2A) when compared  
22 to the average overall amino-acid frequencies of the Ph.D.-7 library. When studied by position, the  
23 distribution of AAF visualized by the respective sequence logos showed a highly skewed distribution,  
24 diverging from the overall background frequencies, only for the N-terminus (Fig. 2B). The actual  
25 frequencies by position are shown in Fig. 2C. The residues of W, D and E appear in similar frequencies

1 but due to the much lower abundance of W, generally and in the phage library, in Fig. 2A it comes up as  
2 selected and D and E – as slightly disfavored. Somewhat surprisingly, the N terminal frequencies skewing  
3 and the preference for A, P and T proved to be properties of the library when comparing the AAF by  
4 position of a non-selected but amplified library (based on the data from Matochko et al., Fig. 2D). The  
5 evidence of selection by IgM stood out in the distribution by position only after using the PWM of the  
6 non-selected amplified library as background frequencies to described the actual enrichment in our  
7 mimotope library (Fig. 2E). It showed higher divergence from the background distribution of the  
8 frequencies in the middle of the sequence. Overrepresentation of proline in positions 2-7 appears to be  
9 a property of the amplified library (background frequencies plus collapse of diversity) while the IgM  
10 binding selected for negatively charged residues, glycine and tryptophan.

11 **Figure 2.** Distribution of the amino acid residues in the mimotope library. (A) Log odds  
12 (LO) relative to background frequencies; (B) sequence logo of the LO by position relative  
13 to the overall background frequencies; (C) sequence logo of the frequencies by position;  
14 (D) sequence logo of the LO by position in an amplified Ph.d.-7 phage library without  
15 ligand selection relative to the overall background frequencies (based on W. L.  
16 Matochko, R. Derda. "Error analysis of deep sequencing of phage libraries: peptides  
17 censored in sequencing". *Comput Math Methods Med*, 2013, 491612. 2013.,  
18 <http://www.chem.ualberta.ca/~derda/parasitepaper/rawfiles/PhD7-GAC-30FuR.txt>); (E)  
19 sequence logo of the LO by position relative to the frequencies by position in the  
20 amplified, unselected library shown in (D). The skewing of the distribution in the free N-  
21 terminus appears to be property of the library while the selection by the IgM repertoire  
22 leads to slight skewing in the middle of the sequence towards negatively charged  
23 residues, glycine and tryptophan.

24  
25 To gain insight into the mimotope sequence space the set of 224 087 selected mimotope sequences was  
26 subjected to clustering using the GibbsCluster-2.0 method [36] originally applied for inferring the  
27 specificity of multiple peptide ligands tested on multiple MHC receptors. The number of clusters was  
28 optimized in the range of 100 to 2500 clusters using the Kullback-Leibler divergence criterion (an  
29 information theory based measure of similarity between two distributions, in this case – two sequence  
30 profiles) comparing the sequences to the background model of random sequences [36]. This criterion

1 indicated optimal clustering in 790 clusters (Fig. 3). Position weighted matrices (PWM) were calculated  
2 from each cluster (Supplement file 2).

3 **Figure 3.** Results from GibbsCluster of the mimotopes. Different predefined number of  
4 clusters were screened for the quality of clustering measured by Kullback-Leibler  
5 Divergence – KLD. The inset shows amplified scale around the peak KLD values.

### 6 7 **Generation of libraries of 7-mers targeting different aspects of the IgM igome**

8 The mimotope library of more than 200 000 sequences is a rich source of potential mimotope  
9 candidates for vaccine or diagnostics. The relevance of this mimotope library to the complete IgM  
10 repertoire and the scope of its diversity could be probed comparing several different peptide libraries  
11 with different properties. An alternative library was constructed to check the completeness of the  
12 selected mimotope set (what part of the igome it represents) and the relevance of the clustering found.  
13 To this end,  $2.3 \times 10^6$  random 7-mer sequences were scored for their similarity to each cluster profile and  
14 ranked. The random sequences that were the least related to any of the clusters in the selected library  
15 were used as a negative control (library pepnegrnd – see Suppl. Methods).

16 As a probe of the IgM repertoire for routine diagnostic use, an array of  $10^5$  peptides is of an impractical  
17 size. A way to construct an optimal smaller mimotope library would be to include a representative  
18 sequence of each of the naturally existing 790 clusters as they would sample evenly (symmetrically) the  
19 mimotope sequence space as ensured by the GibbsCluster algorithm. The clusters were found to vary  
20 with respect to the probability of random occurrence so subsequently they were ranked by significance  
21 using this probability (Suppl. Methods). The top 594 clusters were considered further and only the  
22 mimotope with the top score from each cluster was kept as a mimotope prototype for the profile. This  
23 library was labeled peppos.

24 Other libraries of peptides generated for further comparison were: 1) uncertainly clustered sequences  
25 as reflected in their Kulback-Leibler Divergence scores as shown by the GibbsCluster algorithm (pepneg



- 1 and pepneglo); 2) 2 groups of 5 highest scoring clusters – lower diversity libraries (pep5 and pepother5);
- 2 3) random 7-mer sequences predicted to belong to any of the 5 highest scoring clusters based on profile
- 3 scores (pep5pred) and 4) random 7-mer sequences (peprnd) (see Table 1 for description of all libraries).
- 4 The number of sequences per library was constrained by the size of the chip.
- 5

1 **Table 1. Libraries of 7-mer peptides studied.**

2

| <b>Library</b>   | <b>Description</b>                                                                                                                                                                                                                                                                                                                     | <b>N</b>    |
|------------------|----------------------------------------------------------------------------------------------------------------------------------------------------------------------------------------------------------------------------------------------------------------------------------------------------------------------------------------|-------------|
| <b>peppos</b>    | The sequence with the highest score for the respective position weighted matrix from each significant cluster (significant clusters are those for which the number of sequences with more than median PWM score is greater than the expected number of occurrences of such score in random peptides - $p < 0.0001$ by Binomial test) . | 594         |
| <b>pep5</b>      | A group of 5 of the 288 clusters with best binomial $p < 1e-16$ : clusters # 2,6,9,10,11. This library is an example of a lower diversity set.                                                                                                                                                                                         | 600         |
| <b>pepoth5</b>   | A group of 5 of the 288 clusters with best binomial $p < 1e-16$ : clusters # 115,61,55,53, 258. This library is an example of lower diversity set.                                                                                                                                                                                     | 1193        |
| <b>pep5pred</b>  | A hundred and fifty random sequences with log odds scores greater than the median score of the respective cluster for each of 5 clusters (# 2,6,9,10,11). This library tests the capacity of the sequence profiles to capture the antigenic properties of the mimotopes.                                                               | 750         |
| <b>pepneg</b>    | The lowest scoring sequence (using KLD) from each significant cluster. These sequences are least certain to belong to any of the 790 clusters.                                                                                                                                                                                         | 594         |
| <b>pepneglo</b>  | Among the set of the lowest scoring sequences (pepneg) using GibbsCluster's own "Corrected" score - those with score $< 5$ ([36]). Another version of the previous library.                                                                                                                                                            | 82          |
| <b>pepnegrnd</b> | The max scores for each of a set of $2 \times 10^6$ random 7-mer sequences after testing against each cluster PWM are ranked and the sequences with the lowest ranks are retained representing sequences least related to the mimotope library.                                                                                        | 753         |
| <b>peprnd</b>    | 800 random peptides.                                                                                                                                                                                                                                                                                                                   | 800         |
|                  | <b>Total</b>                                                                                                                                                                                                                                                                                                                           | <b>5366</b> |

\* The random sets are constructed with underlying frequencies in phage display library Ph.D -7 .

3

4

## 1 **Comparison between libraries**

2 IgM reactivity in sera from patients with glioblastoma multiforme (GBM), brain metastases of breast  
3 cancers (MB) as well as non-tumor bearing neurosurgery patients (C) was analyzed using the sets of  
4 peptides described in Table 1. The peptide libraries were synthesized in an oriented (C-terminus  
5 attached) planar microarray format. In the first round of experiments, the 8 different libraries defined  
6 were compared based on the IgM reactivity in the sera from 10 patients (Suppl. Fig. 4 and 5). The data  
7 on the mean serum IgM reactivity of the peptides, grouped by library, with the different sera was used  
8 to compare the libraries for their overall reactivity using linear models (Fig. 4A). The proposed optimized  
9 small library (peppos) had significantly higher ( $p < 0.001$ ) average reactivity than pepneg, peprnd or  
10 pepnegrnd. Interestingly, the library theoretically purged of relevant reactivities (pepnegrnd) had indeed  
11 the lowest reactivity, significantly lower than both the weakly clustering peptides (pepneg) and the  
12 random sequences (peprnd) (Suppl. Table 1).

13 Next, the capacity of the different libraries to sample symmetrically the space of mimotope reactivities  
14 was tested. To this end, the total correlation of the IgM reactivity profiles of the peptides in each library  
15 mapped on the ten different sera (Fig. 4B) were compared. The total correlation is a KLD based  
16 multidimensional generalization of mutual information. High total correlation would signify redundancy  
17 in the library with many peptides sharing similar reactivity profiles. The library peppos had the lowest  
18 total correlation, while pepnegrnd, and especially pep5pred had the top total correlation, indicating  
19 redundancy of the information their reactivity carries about the patients, while the pools of 5 clusters –  
20 pep5 and pepother5 – had relatively low correlation. All differences, except between the top two  
21 libraries were significant (Suppl., Table 2).

22 Another way to test the symmetry of the representation of the mimotope reactivity space by the  
23 different libraries is to compare the mean nearest neighbor distance (MNND) of the scaled and centered

1 data of mimotope staining intensity mapped again to the 10 patients' sera IgM reactivity. Peptides  
2 which have similar reactivity profiles with different sera would map to points in the reactivity space that  
3 are close to each other. This clustering in some regions of the space would lead to a lower MNND. The  
4 library peppos ranked second only to pepneglo (Fig. 4D) by this parameter and had a significantly higher  
5 MNND than all the other libraries (Suppl. Table 4.).

6 The correlation of the serum profiles based on the different mimotopes (transposing the matrices of the  
7 previous tests) can also be viewed as a criterion for the capacity of the libraries to extract information  
8 from the IgM repertoire. Due to the extreme multidimensionality, the mean correlation between patient  
9 profile pairs was used to compare the libraries after z transformation of the correlation coefficient to  
10 allow comparison by linear models (Fig. 4C). Again, the peppos library exhibited the lowest mean  
11 correlation - significantly lower compared to the correlation between the reactivities with the other  
12 libraries except for pepnegrnd and pepneglo (Suppl. Table 3.)

13 **Figure 4.** Statistics testing the libraries' capacity to probe the mimotope reactivity space.  
14 A) Mean reactivity of each peptide across patients grouped by library. The optimized  
15 library peppos has the highest reactivity. For library content see Table 1. B) Total  
16 correlation of the peptide profiles grouped by library across 10 patients. The optimized  
17 library peppos provides the least redundant information. C) Mean correlation of patient  
18 profiles across the peptides in each library compared after z-transformation. The  
19 optimized library peppos provides the most diverse characteristics of the patients,  
20 which indicates a high potential for discrimination of different states but increases the  
21 requirements for the size of the teaching sets to extract models of good generalization.  
22 D) Mean nearest neighbor distance of the peptide profiles across 10 patients in each  
23 library. Again, the optimized library peppos appears to sample the mimotope reactivity  
24 space evenly. The width of the bars is proportional to the size of the sample.

25 Finally, all four criteria were summarized using a rank product test, which proved that reactivity with  
26 peppos stands out from all the other tested libraries as the best among them for probing the IgM  
27 repertoire (Table 2).

28

1 **Table 2.** Rank product test of four criteria for optimal mimotope library:

| Library   | Rank Products   | p Value         |
|-----------|-----------------|-----------------|
| pep5      | 4.864599        | 0.78057         |
| pep5pred  | 5.825901        | 0.924705        |
| pepneg    | 5.957892        | 0.937399        |
| pepneglo  | 2.114743        | 0.054359        |
| pepnegrnd | 6.0548          | 0.945747        |
| pepoth5   | 3.22371         | 0.318709        |
| peppos    | <b>1.189207</b> | <b>0.001071</b> |
| peprnd    | 4.864599        | 0.78057         |

2

### 3 **Visualization of the Mimotope Space**

4 T distributed stochastic neighbor embedding (t-sne) was used to visualize the structure of the mimotope  
5 sequence space as represented by the general mimotope library produced by deep panning. To  
6 represent the sequences as vectors of real numbers, each amino acid residue was represented by 5  
7 scores based on the z1-z5 scales published by of Sandberg et al. (1998) (see Suppl. Methods for details).  
8 Thus, each 7-mer sequence was parametrized as a 35-dimensional vector. These vectors were then  
9 represented in two dimensions by t-sne transformation. The map of the mimotope library, thus  
10 generated, resembled that of an equal number of random 7-mer sequences constructed using the  
11 residue background frequencies of the phage display library (Suppl. Fig. 7). Next the representation of  
12 some of the clusters of mimotopes described above were mapped in this new mapping. Although most  
13 of the five most significant among 790 sequence clusters (the pep5 library, Suppl. Figure 7) mapped to  
14 rather scattered clusters, the mapping of the optimized library (peppos) still covered symmetrically the  
15 mimotope sequence space (Fig. 5). Both the clustering and the mapping do not give unique solutions  
16 and fail to capture the full information in the general mimotope data set. Yet, the symmetry of the

1 rationally small library designed on the basis of the clustering is preserved in the t-sne mapping  
2 indicating that it is an actual property of the small library peppos.  
3 Mapping together mimotopes and random peptides helped estimate the proportion of the 7-mer  
4 sequence space which is under sampled by the mimotope library (Fig. 6, see Suppl. Methods for details).  
5 To partition the sequences in logical groups, k-means clustering on the t-sne map was performed. The  
6 proportion of mimotopes and random sequences in each cluster were calculated next. While all clusters  
7 defined by the k-means clustering contained mimotopes, the proportion of mimotope varied producing  
8 2 types of clusters – some with equal representation of random sequences and mimotopes and some  
9 with predominance of random sequences. The random peptide sequences with minimal similarity to the  
10 IgM igome (library pepnegrnd) mapped also to the areas of the low density of mimotopes.  
11 Approximately 42 % of the random sequences, 14% of the mimotopes and 85% of the pepnegrnd library  
12 were in the underrepresented areas (Chi square,  $p < 0.0001$ ). The areas of the sequence space  
13 underrepresented in the IgM mimotopes had very similar sequence profiles to the normally represented  
14 areas, except for less abundant charged residues (Suppl. Data file “t-sne cluster profiles”).

15 **Figure 5.** Visualization of the 7-mer mimotope sequence space with the optimized  
16 library peppos marked in red (see fig.8 for details). Although, individual GibbsCluster  
17 defined clusters do not coincide with those shown by t-sne, the mapping of the  
18 optimized library apparently probes quite uniformly the mimotope sequence space.

19 **Figure 6.** Visualization of the 7-mer peptide mimotope sequence space representing a  
20 mixture of random sample of 50 000 phage display selected mimotopes (red) and 50  
21 000 random sequences (gray) plus the pepnegrnd library (blue). A part of the sequence  
22 space is represented by mimotopes at a lower density and the sequences unrelated to  
23 the defined 790 mimotope clusters map mostly to this area (blue points). A high  
24 definition version of this figure is included in the supplemental information.  
25

## 26 **Diagnostic potential of a rationally designed restricted mimotope library**

27 A suitably sized universal mimotope library sampling optimally the public IgM reactivities would have  
28 multiple applications both in the theoretical research of antibody repertoires, as well as in the design of

1 theranostic tools. Having support for the hypothesis that the mimotope library peppos, sampling major  
 2 sequence clusters, is optimal when compared to a set of 8 other libraries, we next studied its diagnostic  
 3 potential using sera from a larger set of patients (n=34) with brain tumors. Due to the small data set, the  
 4 main goal was a “proof of principle” test demonstrating the capacity of the assay to provide mimotope  
 5 profiles (feature subsets in machine learning parlance) suitable for building predictors for randomly  
 6 selected pathology. The distribution of patients by diagnosis (glioblastoma multiforme – GBM, lung  
 7 cancer metastases in the brain – ML, breast cancer metastases in the brain – MB, and non-tumor  
 8 bearing patients – C) is shown in Table 3. After cleaning, local, global normalization and balancing the  
 9 group sizes which warranted the use of ComBat [37] for the following batch compensation, the  
 10 reactivity data represented 28 patients’ serum IgM binding to 586 peptides. The comparison between  
 11 the staining intensities of the mimotopes (or features) in the patients’ diagnostic groups yielded  
 12 overlapping sets of reactivities significantly expressed in each diagnosis as compared to the other two -  
 13 290 features for GBM, 263 for ML, and 204 for C. Overall, 380 features showed significant reactivity in  
 14 at least one of the diagnostic groups. The “negative” peptides (library pepnegrnd) represented 49/206  
 15 non-significant and 24/380 significant reactivities ( $\chi^2$ ,  $p < 0.0001$ ). The finding of individuals with IgM  
 16 reactive for some of them when testing a larger group is not a surprise. That is why the background  
 17 reactivity was considered more reliably determined by the data analysis, rather than on the mean level  
 18 of the pepnegrnd library.

19 **Table 3.** Patients tested using the optimized library.  
 20

| Diagnosis                        | Abbr. | Batches |   |       | Total    |
|----------------------------------|-------|---------|---|-------|----------|
|                                  |       | G       | P | R     |          |
| Non-tumor bearing (control)      | C     | 1       | 3 | 4     | 8        |
| Glioblastoma Multiforme          | GBM   | 2       | 4 | 9(5)* | 15 (11)* |
| Lung Cancer (Brain Metastasis)   | ML    | 2       | 4 | 3     | 9        |
| Breast Cancer (Brain Metastasis) | MB    | 0       | 0 | 2(0)* | 2 (0)*   |

|  |              |    |
|--|--------------|----|
|  | <b>Total</b> | 34 |
|--|--------------|----|

1 To balance the group sizes between batches, only 5/9 GBM samples from batch “R” were used and the  
2 breast cancer cases were omitted before batch compensation using the ComBat function. All cases in  
3 batch “R” were used in the validation step.  
4

5 A projection of the cases on the 380 positive reactivities by multidimensional scaling (MDS) which maps  
6 the data to two dimensions showed no separation (Suppl. Fig.9). The feature space is highly  
7 multidimensional. The peptide library is not targeted to any particular pathology, but represents a  
8 universal tool for IgM repertoire studies. Therefore, a feature selection step is necessary to construct a  
9 predictor for each diagnostic task.

10 A recursive elimination algorithm was applied whereby features were removed successively in a way  
11 that improves the separation of the patient data clusters of interest until no further improvement of  
12 separation is possible (see Supplemental methods section for details). Using this approach, we tested  
13 the capacity of the smaller feature sets, thus selected, to separate dichotomously GBM from the rest.  
14 Support vector machine (SVM) models based on these optimal feature subsets still suffered from  
15 overfitting as demonstrated by a leave one out validation (data not shown). Aiming at a better  
16 generalization, next we explored the variation of the feature sets selected by recursive elimination using  
17 sets of patient data that differed by two cases in a bootstrap scheme (Supplemental Methods). It was  
18 surprising to find that so similar teaching sets differed considerably in the optimal features (mimotope  
19 reactivities) selected by them with only 4 features common for all patient sets. The reason for this could  
20 be the variability between individuals and the capacity of the mimotope library to reflect it. It was  
21 possible to demonstrate that the best prediction both of the teaching and of the validation sets was  
22 achieved when using the features that recurred in at least 50% of the bootstrap runs of the recursive  
23 elimination algorithm (Fig. 7).



1           **Figure 7.** Matthew's correlation coefficient as a measure of the prediction quality for  
2           SVM models constructed using GBM predicting feature sets of different minimal  
3           commonality. Minimal commonality of  $n$  means that the features in the set are found in  
4            $n$  or more of the bootstrap sets. The validation set consists of the cases in batch "R" that  
5           were omitted from the batch compensated united sets. The model predicts these cases  
6           as belonging to the same class as the rest of the respective cases in batch "R". Since the  
7           values in batch "R" were not subject to batch compensation the validation also serves as  
8           a control against confounding introduced by the ComBat function.

9           Interestingly, this two stage feature selection strategy helped improve considerably the generalization  
10          and a SVM model constructed on a 2-dimensional mapping (using multidimensional scaling) of the IgM  
11          reactivity to the set of 55 mimotopes, thus selected, successfully classified the GBM and non-GBM cases  
12          in the validation set of sera.

13           **Figure 8.** Multidimensional scaling plot of cases in batch "R" based on the feature set of  
14           minimal commonality of 50%. See figure 7 and Supplemental Methods for details. The  
15           encircled points correspond to the validation set.

16          Thus, we were able to show that a rationally designed small library of 586 IgM mimotopes contains  
17          potentially a huge number of mimotope profiles that can differentiate randomly selected diagnoses  
18          after appropriate feature selection.

19

## 1 **Discussion**

2 High-throughput omics screening methods have led to the identification of biomarkers as profiles  
3 extracted from a particular dynamic diversity – proteome, genome, glycome, secretome, etc. The use of  
4 the antibody repertoire as a source of biomarkers has been defined and approached in multiple ways.  
5 First came the technically minimalistic, but conceptually loaded, semi quantitative immunoblotting,  
6 developed 20 years ago. This technique served as no less than a paradigm setter for systems  
7 immunology [38-43]. The further development produced methods that have been referred to as  
8 functional immunomics [33] in terms of protein reactivities, as immunosignaturing [31] in terms of  
9 random peptide libraries, or described as a deep panning technique [44] and in terms of igome of  
10 mimotopes selected from random phage display libraries. Here we describe the design of the first  
11 mimotope library for the analysis of the human IgM repertoire of reactivities recurrent in most  
12 individuals [12,45,46].

13 The deep panning approach relies on next generation sequencing (NGS), and thus requires balancing  
14 between sequence fidelity and diversity. Even with diversity affected by discarding sequences of one  
15 and two copies on the one hand, and overgrowth of phage clones on the other, our strategy still  
16 manages to find a general representation of the mimotope sequence space by identifying clusters of  
17 mimotopes. This relatively small set of sequence classes is hypothesized to be related to the modular  
18 organization of the repertoire defined previously [47].

19 The central role of prolines in the natural antibody mimotopes has been observed previously [48].  
20 Tchernychev et al. also used a phage display library, and now it is clear that the high proline content is  
21 related to the bias of the particular phage display library. This property of the library may facilitate the  
22 discovery of mimotopes because prolines are associated with turns and flanking structures and proline  
23 abundance also reduces the entropic component of the binding. The selection by the IgM repertoire led  
24 to an enrichment of tryptophan and negatively charged residues in the middle of the sequences

1 suggesting that the public IgM reactivity has a preference for loop like mimotopes (facilitated by the  
2 presence of prolines) with negative charges. The abundance of tryptophan is also interesting in terms of  
3 its propensity (together with proline) to mimic carbohydrate structures [49].

4 The mimotope library of diversity  $10^5$  derived by deep panning reflects the recurrent (also referred to as  
5 public) IgM specificities found in the human population. The low IgM reactivity to the library of random  
6 peptides with sequences least related to the 790 clusters suggests that not only the library of a little  
7 over 200 000 mimotopes represents well the IgM mimotope space but also that the 790 sequence  
8 clusters provide a rather complete description of that space. The good coverage of the IgM reactivity  
9 space may be facilitated by the polyspecific binding of IgM to small peptides.

10 Although the large mimotope library can be used as is in large arrays when applicable it is not very  
11 practical for routine diagnostics. The classification in 790 clusters was used to produce a smaller and  
12 more applicable library for clinical use, of a subset of approx. 600 mimotopes (peppos) by picking  
13 representative sequences from the most significant clusters. Thus, this library was designed and shown  
14 to optimally represent the mimotopes' main public reactivity patterns found in the phage selection  
15 experiment. The proposed optimized small library could be used as a tool for the study of the IgM public  
16 repertoire, as a source of mimotopes for design of immunotherapeutics [50-53], but mostly it may be  
17 applied as a multipurpose diagnostic tool.

18 As a diagnostic tool, the optimized small library has some key properties that distinguish it from other  
19 omic sets. Since it is designed to represent practically ubiquitous public specificities, the sets of features  
20 (mimotope reactivities), significantly expressed in the different diagnoses, were overlapping  
21 considerably. No single reactivity was correlating strongly with a whole diagnostic group, but subsets of  
22 reactivities collectively could separate the diagnoses. Thus, feature selection becomes essential for the  
23 design of predictors based on polyspecificities. Using the proposed algorithms, the typical feature set  
24 tuned for a dichotomous separation of diagnoses contained between 28 and 111 sequences

1 (median=66). The improvement of generalization by keeping only features recurring in the bootstrap  
2 feature selection algorithm helped reduce the overfitting of the models. The optimal feature set for  
3 GBM diagnosis contained 55 mimotopes. Thus, if the library provides in the order of 500 significant  
4 reactivities, the theoretical capacity of this approach is  $>10^{70}$  different subsets in case of just qualitative  
5 differences of presence or absence of reactivity. Thus, the information provided by a typical IgM binding  
6 assay with the library is probably enough to describe any physiological or pathological state of clinical  
7 relevance reflected in the IgM repertoire. Of course, this is just an estimate of the resolution of the  
8 method. The number of naturally occurring profiles and their correlation with clinically relevant states  
9 will determine the actual capacity.

10 The novelty of our approach is based on the combination of several previously existing concepts:

11 First, early studies argued that the physiologically autoreactive natural antibodies comprise a consistent,  
12 organized immunological compartment [40,43,54-57]. The consistency of the natural antibody self-  
13 reactivity among individuals was considered evidence for the existence of a relatively small set of  
14 preferred self-antigens. Such “public reactivities” are most probably related to the germline repertoire  
15 of antibodies generated by evolutionarily encoded paratope features and negative/positive selection  
16 [34,58]. These antibodies were targeted using protein microarrays, the utility of which has been  
17 previously demonstrated [23,33,34,47]. Recently, the existence of structurally distinct public V-regions  
18 has been analyzed using repertoire sequencing [12], noting that they are often found in natural  
19 antibodies. If the repertoire should be read as a source of information providing consistent patterns that  
20 can be mapped to physiological and pathological states, the public natural IgM autoreactivity seems to  
21 be a suitable but underused compartment.

22 Second, germline variable regions are characterized by polyspecificity or cross-reactivity with protein  
23 and non-protein antigens [14]. It seems that going for epitopes could be a way to approach the  
24 repertoire convolution. Yet, the actual epitopes will be mostly conformational and hard to study. In

1 similar tasks, mimotopes are often used [59-62], yet M.H. Van Regenmortel argues that mimotopes are  
2 of little use to structural prediction of the B-cell epitope [61]. Therefore, their utility might be rather in  
3 the structural study of the repertoire as a whole.

4 Third, the usage of peptide arrays for the analysis of the antibody repertoire is increasingly popular  
5 [44,63-66]. It involves the use of random peptide arrays for extracting repertoire immunosignatures by  
6 some groups and deep panning of phage display libraries to analyze antibody responses by others. Since  
7 an antibody can often cross-react with a linear epitope that is part of the nominal conformational  
8 epitope [61], the 7-residue library offers suitable short mimotopes as compared to typical B-cell epitope  
9 combining exhaustive set of sequences with considerable structural complexity. Furthermore, from the  
10 Immunoepitope Database (<http://www.iedb.org>) collection of linear B cell epitopes, 4821 of 45829  
11 entries are less than 8 residues long.

12 The library also provides a rich source of mimotopes that can be screened for different theranostic tasks  
13 focused on particular targets. On an omics scale, the smaller optimized mimotope library proposed here  
14 probes efficiently the relevant repertoire of public IgM reactivities matching its dynamic diversity with  
15 potentially over  $10^{70}$  distinct profiles. The major task ahead is designing studies aimed at efficiently  
16 extracting specific diagnostic profiles and building appropriate predictors, e.g. – for classifying  
17 immunotherapy responders, predicting the risk of malignancy in chronic inflammation, etc.

18

## 19 **Materials and methods**

### 20 **Deep panning**

21 Human IgM was isolated from a sample of IgM enriched IVIg - IgM-Konzentrat (Biotest AG, Dreieich,  
22 Germany, generously provided by Prof. Srini Kaveri), while human monoclonal IgM paraprotein was  
23 isolated from an IgM myeloma patient's serum selected from the biobank at the Center of Excellence for  
24 Translational Research in Hematology at the National Hematology Hospital, Sofia (with the kind

1 cooperation of Dr. Lidiya Gurcheva ). In both cases, IgM was purified using affinity chromatography with  
2 polyclonal anti- $\mu$  antibody coupled to agarose (A9935, SIGMA-ALDRICH, USA). A 7-mer random peptide  
3 library (E8100S, Ph.D. -7, New England Biolabs, USA) was panned overnight at 4°C on pooled human IgM  
4 adsorbed on polystyrene plates at a concentration of 0.1 mg/ml, washed, eluted with glycine buffer at  
5 pH 2.7 and immediately brought to pH7. The eluate was transferred to a plate coated with monoclonal  
6 IgM and incubated according to the same protocol, but this time the phage solution was collected after  
7 adsorption and amplified once, according to Matochko et al. [35]. Briefly, the phage DNA was extracted  
8 and the peptide-coding fragment amplified by PCR. The amplicons were subjected to deep sequencing  
9 using the Next Seq platform (Illumina, USA), performed at the Sequencing Core Facility of Oslo  
10 University Hospital.

#### 11 **Patients' sera**

12 Sera from randomly selected patients with glioblastoma multiforme (GBM), low grade glioma (G), brain  
13 metastases of breast (MB) or lung (ML) cancers, as well as non-tumor bearing patients (C) (herniated  
14 disc surgery, trauma, etc.) of the Neurosurgery Clinic of St. Ivan Rilski University Hospital, Sofia acquired  
15 according to the rules of the ethics committee of the Medical University in Sofia, after its approval and  
16 obtaining informed consent, were analyzed on the sets of peptides defined in microarray format. The  
17 sera were aliquoted and stored at -20°C. Before staining the sera were thawed, incubated for 30 min at  
18 37°C for dissolution of IgM complexes, diluted 1:100 with PBS, pH 7.4, 0.05% Tween 20 with 0.1% BSA,  
19 further incubated for 30 min at 37°C and filtered through 0.22 $\mu$ m filters before application on the chips.

#### 20 **Peptide microarray**

21 The customized microarray chips were produced by PEPperPRINT™ (Heidelberg, Germany) by synthesis  
22 in situ as 7-mer peptides attached to the surface through their C-terminus and a common spacer GGGs.  
23 The layout was in a format of a single field of up to 5500 or five fields of up to 600 peptides in randomly

1 positioned duplicates. The chips were blocked for 60 minutes using PBS, pH 7.4, 0.05% Tween 20 with  
2 1% BSA on a rocker, washed 3x1 min with PBS, pH 7.4, 0.05% Tween 20 and incubated with sera in  
3 dilutions equivalent to 0.01 mg/ml IgM (approx. 1:100 serum dilution) on a rocker overnight at 4°C.  
4 After 3x1 minute washing the chips were incubated with secondary antibodies at RT, washed, rinsed  
5 with distilled water and dried by spinning in a vertical position in empty 50 ml test tubes at 100 x g for 2  
6 minutes.

### 7 **Microarray data treatment**

8 The microarray images were acquired using a GenePix 4000 Microarray Scanner (Molecular Devices,  
9 USA). The densitometry was done using the GenePix® Pro v6.0 software. All further analysis was  
10 performed using publicly available packages of the R statistical environment for Windows (v3.4.1)  
11 (Bioconductor – Biostrings, limma, pepStat, sva, e1071, Rtsne, clvalid, entropy, RankProd, multcomp) as  
12 well as in house developed R scripts (<https://github.com/ansts/IgMimoPap1> and  
13 <https://github.com/ansts/IgMimoPap2>  
14 ). For algorithm details see Suppl. Methods.

15

### 16 **Competing interests**

17 The authors declare no competing interests.

18 **ACKNOWLEDGEMENTS** This work was performed with the support of EEA/Norway Grant BG09/D03-103  
19 and the Bulgarian Fund for Scientific Research Grant D01-11/2016. The authors wish to thank Prof.  
20 Radha Nagarajan, Prof. Ivanka Tsakovska and Prof. Soren Hairabedian for critically reading the  
21 manuscript and a number of useful comments.

## 1 **References**

- 2 1. Baumgarth N, Herman OC, Jager GC, Brown LE, Herzenberg LA, Chen J (2000) B-1 and B-2 cell-derived  
3 immunoglobulin M antibodies are nonredundant components of the protective response to  
4 influenza virus infection. *J Exp Med* 192: 271-280.
- 5 2. Ochsenbein AF, Fehr T, Lutz C, Suter M, Brombacher F, Hengartner H, et al. (1999) Control of early  
6 viral and bacterial distribution and disease by natural antibodies. *Science* 286: 2156-2159.
- 7 3. Vollmers HP, Brandlein S (2007) Tumors: too sweet to remember? *Mol Cancer* 6: 78.
- 8 4. Matter MS, Ochsenbein AF (2008) Natural antibodies target virus-antibody complexes to organized  
9 lymphoid tissue. *Autoimmun Rev* 7: 480-486.
- 10 5. Avrameas S, Guilbert B, Dighiero G (1981) Natural antibodies against tubulin, actin myoglobin,  
11 thyroglobulin, fetuin, albumin and transferrin are present in normal human sera, and  
12 monoclonal immunoglobulins from multiple myeloma and Waldenstrom's macroglobulinemia  
13 may express similar antibody specificities. *Ann Immunol (Paris)* 132C: 231-236.
- 14 6. Panda S, Zhang J, Tan NS, Ho B, Ding JL (2013) Natural IgG antibodies provide innate protection  
15 against ficolin-opsonized bacteria. *EMBO J* 32: 2905-2919.
- 16 7. Vollmers HP, Brandlein S (2009) Natural antibodies and cancer. *N Biotechnol* 25: 294-298.
- 17 8. Prieto JMB, Felipe MJB (2017) Development, phenotype, and function of non-conventional B cells.  
18 *Comp Immunol Microbiol Infect Dis* 54: 38-44.
- 19 9. Lobo PI (2016) Role of Natural Autoantibodies and Natural IgM Anti-Leucocyte Autoantibodies in  
20 Health and Disease. *Front Immunol* 7: 198.
- 21 10. Rothstein TL, Griffin DO, Holodick NE, Quach TD, Kaku H (2013) Human B-1 cells take the stage.  
22 *Annals of the New York Academy of Sciences* 1285: 97-114.
- 23 11. Weller S, Braun MC, Tan BK, Rosenwald A, Cordier C, Conley ME, et al. (2004) Human blood IgM  
24 "memory" B cells are circulating splenic marginal zone B cells harboring a pre-diversified  
25 immunoglobulin repertoire. *Blood*.
- 26 12. Greiff V, Weber CR, Palme J, Bodenhofer U, Miho E, Menzel U, et al. (2017) Learning the High-  
27 Dimensional Immunogenomic Features That Predict Public and Private Antibody Repertoires.  
28 *The Journal of Immunology* 199: 2985-2997.
- 29 13. Van Regenmortel MH (2014) Specificity, polyspecificity, and heterospecificity of antibody-antigen  
30 recognition. *J Mol Recognit* 27: 627-639.
- 31 14. Willis JR, Briney BS, DeLuca SL, Crowe JE, Jr., Meiler J (2013) Human Germline Antibody Gene  
32 Segments Encode Polyspecific Antibodies. *PLoS Comput Biol* 9: e1003045.
- 33 15. Cohen IR, Young DB (1991) Autoimmunity, microbial immunity and the immunological homunculus.  
34 *Immunol Today* 12: 105-110.
- 35 16. Avrameas S, Guilbert B, Mahana W, Matsiota P, Ternynck T (1988) Recognition of self and non-self  
36 constituents by polyspecific autoreceptors. *Int Rev Immunol* 3: 1-15.
- 37 17. Avrameas S (1991) Natural autoantibodies: from 'horror autotoxicus' to 'gnothi seauton'. *Immunol*  
38 *Today* 12: 154-159.
- 39 18. Reynolds AE, Kuraoka M, Kelsoe G (2015) Natural IgM is produced by CD5- plasma cells that occupy a  
40 distinct survival niche in bone marrow. *J Immunol* 194: 231-242.
- 41 19. Silverman GJ, Srikrishnan R, Germar K, Goodyear CS, Andrews KA, Ginzler EM, et al. (2008) Genetic  
42 imprinting of autoantibody repertoires in systemic lupus erythematosus patients. *Clin Exp*  
43 *Immunol* 153: 102-116.
- 44 20. Sharron B-Z, Dror YK, Gittit D, Asaf M, Yifat M, Francisco JQ, et al. (2013) Individual and meta-  
45 immune networks. *Physical Biology* 10: 025003.
- 46 21. Mao J, Ladd J, Gad E, Rastetter L, Johnson MM, Marzbani E, et al. (2014) Mining the pre-diagnostic  
47 antibody repertoire of TgMMTV-neu mice to identify autoantibodies useful for the early  
48 detection of human breast cancer. *J Transl Med* 12: 121.



- 1 22. Butvilovskaya VI, Popletaeva SB, Chechetkin VR, Zubtsova ZI, Tsybul'skaya MV, Samokhina LO, et al.  
2 (2016) Multiplex determination of serological signatures in the sera of colorectal cancer patients  
3 using hydrogel biochips. *Cancer Med*.
- 4 23. Merbl Y, Itzchak R, Vider-Shalit T, Louzoun Y, Quintana FJ, Vadai E, et al. (2009) A Systems  
5 Immunology Approach to the Host-Tumor Interaction: Large-Scale Patterns of Natural  
6 Autoantibodies Distinguish Healthy and Tumor-Bearing Mice. *PLoS ONE* 4: e6053.
- 7 24. Stafford P, Wrapp D, Johnston SA (2016) General Assessment of Humoral Activity in Healthy  
8 Humans. *Mol Cell Proteomics* 15: 1610-1621.
- 9 25. Campbell CT, Gulley JL, Oyelaran O, Hodge JW, Schlom J, Gildersleeve JC (2013) Serum Antibodies to  
10 Blood Group A Predict Survival on PROSTVAC-VF. *Clinical Cancer Research* 19: 1290-1299.
- 11 26. Kulthanan K, Pinkaew S, Suthipinittharm P (1998) Diagnostic value of IgM deposition at the dermo-  
12 epidermal junction. *Int J Dermatol* 37: 201-205.
- 13 27. Borrelli M, Maglio M, Agnese M, Paparo F, Gentile S, Colicchio B, et al. (2010) High density of  
14 intraepithelial  $\gamma\delta$  lymphocytes and deposits of immunoglobulin (Ig)M anti-tissue  
15 transglutaminase antibodies in the jejunum of coeliac patients with IgA deficiency. *Clinical and*  
16 *Experimental Immunology* 160: 199-206.
- 17 28. Chan RK, Ding G, Verna N, Ibrahim S, Oakes S, Austen WG, Jr., et al. (2004) IgM binding to injured  
18 tissue precedes complement activation during skeletal muscle ischemia-reperfusion. *J Surg Res*  
19 122: 29-35.
- 20 29. Hensel F, Hermann R, Schubert C, Abe N, Schmidt K, Franke A, et al. (1999) Characterization of  
21 glycosylphosphatidylinositol-linked molecule CD55/decay-accelerating factor as the receptor for  
22 antibody SC-1-induced apoptosis. *Cancer Res* 59: 5299-5306.
- 23 30. Vollmers HP, Brandlein S (2005) The "early birds": natural IgM antibodies and immune surveillance.  
24 *Histol Histopathol* 20: 927-937.
- 25 31. Hughes AK, Cichacz Z, Scheck A, Coons SW, Johnston SA, Stafford P (2012) Immunosignaturing Can  
26 Detect Products from Molecular Markers in Brain Cancer. *PLoS ONE* 7: e40201.
- 27 32. Stafford P, Halperin R, Legutki JB, Magee DM, Galgiani J, Johnston SA (2012) Physical  
28 Characterization of the "Immunosignaturing Effect". *Molecular & Cellular Proteomics* 11.
- 29 33. Quintana FJ, Hagedorn PH, Elizur G, Merbl Y, Domany E, Cohen IR (2004) Functional immunomics:  
30 microarray analysis of IgG autoantibody repertoires predicts the future response of mice to  
31 induced diabetes. *Proc Natl Acad Sci U S A* 101 Suppl 2: 14615-14621.
- 32 34. Merbl Y, Zucker-Toledano M, Quintana FJ, Cohen IR (2007) Newborn humans manifest  
33 autoantibodies to defined self molecules detected by antigen microarray informatics. *J Clin*  
34 *Invest* 117: 712-718.
- 35 35. Matochko WL, Chu K, Jin B, Lee SW, Whitesides GM, Derda R (2012) Deep sequencing analysis of  
36 phage libraries using Illumina platform. *Methods* 58: 47-55.
- 37 36. Andreatta M, Lund O, Nielsen M (2013) Simultaneous alignment and clustering of peptide data using  
38 a Gibbs sampling approach. *Bioinformatics* 29: 8-14.
- 39 37. Nygaard V, Rodland EA, Hovig E (2016) Methods that remove batch effects while retaining group  
40 differences may lead to exaggerated confidence in downstream analyses. *Biostatistics* 17: 29-39.
- 41 38. Haury M, Grandien A, Sundblad A, Coutinho A, Nobrega A (1994) Global analysis of antibody  
42 repertoires. 1. An immunoblot method for the quantitative screening of a large number of  
43 reactivities. *Scand J Immunol* 39: 79-87.
- 44 39. Stahl D, Yeshurun M, Gorin NC, Sibrowski W, Kaveri SV, Kazatchkine MD (2001) Reconstitution of  
45 Self-Reactive Antibody Repertoires of Autologous Plasma IgM in Patients with Non-Hodgkin's  
46 Lymphoma Following Myeloablative Therapy. *Clinical Immunology* 98: 31-38.
- 47 40. Mouthon L, Haury M, Lacroix-Desmazes S, Barreau C, Coutinho A, Kazatchkine MD (1995) Analysis of  
48 the normal human IgG antibody repertoire. Evidence that IgG autoantibodies of healthy adults

- 1 recognize a limited and conserved set of protein antigens in homologous tissues. *J Immunol* 154:  
2 5769-5778.
- 3 41. Lacroix-Desmazes S, Mouthon L, Coutinho A, Kazatchkine MD (1995) Analysis of the natural human  
4 IgG antibody repertoire: life-long stability of reactivities towards self antigens contrasts with  
5 age-dependent diversification of reactivities against bacterial antigens. *Eur J Immunol* 25: 2598-  
6 2604.
- 7 42. Nobrega A, Haury M, Grandien A, Malanchere E, Sundblad A, Coutinho A (1993) Global analysis of  
8 antibody repertoires. II. Evidence for specificity, self-selection and the immunological  
9 "homunculus" of antibodies in normal serum. *Eur J Immunol* 23: 2851-2859.
- 10 43. Mouthon L, Nobrega A, Nicolas N, Kaveri SV, Barreau C, Coutinho A, et al. (1995) Invariance and  
11 restriction toward a limited set of self-antigens characterize neonatal IgM antibody repertoires  
12 and prevail in autoreactive repertoires of healthy adults. *Proc Natl Acad Sci U S A* 92: 3839-3843.
- 13 44. Ryvkin A, Ashkenazy H, Smelyanski L, Kaplan G, Penn O, Weiss-Ottolenghi Y, et al. (2012) Deep  
14 Panning: steps towards probing the IgOme. *PLoS One* 7: e41469.
- 15 45. Truck J, Ramasamy MN, Galson JD, Rance R, Parkhill J, Lunter G, et al. (2015) Identification of  
16 antigen-specific B cell receptor sequences using public repertoire analysis. *J Immunol* 194: 252-  
17 261.
- 18 46. Gu H, Tarlinton D, Muller W, Rajewsky K, Forster I (1991) Most peripheral B cells in mice are ligand  
19 selected. *J Exp Med* 173: 1357-1371.
- 20 47. Madi A, Hecht I, Bransburg-Zabary S, Merbl Y, Pick A, Zucker-Toledano M, et al. (2009) Organization  
21 of the autoantibody repertoire in healthy newborns and adults revealed by system level  
22 informatics of antigen microarray data. *Proceedings of the National Academy of Sciences* 106:  
23 14484-14489.
- 24 48. Tchernychev B, Cabilly S, Wilchek M (1997) The epitopes for natural polyreactive antibodies are rich  
25 in proline. *Proc Natl Acad Sci U S A* 94: 6335-6339.
- 26 49. Luo P, Agadjanyan M, Qiu J, Westerink MA, Steplewski Z, Kieber-Emmons T (1998) Antigenic and  
27 immunological mimicry of peptide mimotopes of Lewis carbohydrate antigens. *Mol Immunol* 35:  
28 865-879.
- 29 50. Scott JK (1992) Discovering peptide ligands using epitope libraries. [Review]. *Trends in Biochemical*  
30 *Sciences* 17: 241-245.
- 31 51. Westerink MA, Giardina PC, Apicella MA, Kieber-Emmons T (1995) Peptide mimicry of the  
32 meningococcal group C capsular polysaccharide. *Proc Natl Acad Sci U S A* 92: 4021-4025.
- 33 52. Kieber-Emmons T (1998) Peptide mimotopes of carbohydrate antigens. *Immunol Res* 17: 95-108.
- 34 53. Pashov A, Canziani G, Monzavi-Karbassi B, Kaveri SV, Macleod S, Saha R, et al. (2005) Antigenic  
35 properties of peptide mimotopes of HIV-1-associated carbohydrate antigens. *J Biol Chem* 280:  
36 28959-28965.
- 37 54. Cohen IR (1992) The cognitive paradigm and the immunological homunculus. *Immunol Today* 13:  
38 490-494.
- 39 55. Cohen IR (2013) Autoantibody repertoires, natural biomarkers, and system controllers. *Trends*  
40 *Immunol* 34: 620-625.
- 41 56. Lacroix-Desmazes S, Mouthon L, Pashov A, Barreau C, Kaveri SV, Kazatchkine MD (1997) Analysis of  
42 antibody reactivities toward self antigens of IgM of patients with Waldenstrom's  
43 macroglobulinemia. *Int Immunol* 9: 1175-1183.
- 44 57. Mouthon L, Lacroix-Desmazes S, Nobrega A, Barreau C, Coutinho A, Kazatchkine MD (1996) The self-  
45 reactive antibody repertoire of normal human serum IgM is acquired in early childhood and  
46 remains stable throughout life. *Scand J Immunol* 44: 243-251.
- 47 58. Hardy RR, Hayakawa K (2012) Positive and negative selection of natural autoreactive B cells. *Adv Exp*  
48 *Med Biol* 750: 227-238.

- 1 59. Putterman C, Deocharan B, Diamond B (2000) Molecular analysis of the autoantibody response in  
2 peptide-induced autoimmunity. *J Immunol* 164: 2542-2549.
- 3 60. Pashov A, Monzavi-Karbassi B, Kieber-Emmons T (2009) Immune surveillance and immunotherapy:  
4 Lessons from carbohydrate mimotopes. *Vaccine* 27: 3405-3415.
- 5 61. Van Regenmortel MH (2009) What is a B-cell epitope? *Methods Mol Biol* 524: 3-20.
- 6 62. Huang J, He B, Zhou P (2014) Mimotope-based prediction of B-cell epitopes. *Methods Mol Biol* 1184:  
7 237-243.
- 8 63. Weber LK, Palermo A, Kugler J, Armant O, Isse A, Rentschler S, et al. (2017) Single amino acid  
9 fingerprinting of the human antibody repertoire with high density peptide arrays. *J Immunol*  
10 *Methods* 443: 45-54.
- 11 64. Weiss-Ottolenghi Y, Gershoni JM (2014) Profiling the IgOme: meeting the challenge. *FEBS Lett* 588:  
12 318-325.
- 13 65. Navalkar KA, Johnston SA, Stafford P (2014) Peptide based diagnostics: Are random-sequence  
14 peptides more useful than tiling proteome sequences? *J Immunol Methods*.
- 15 66. Legutki JB, Zhao ZG, Greving M, Woodbury N, Johnston SA, Stafford P (2014) Scalable high-density  
16 peptide arrays for comprehensive health monitoring. *Nat Commun* 5: 4785.

17

18 **Author Contribution:**

19 A.P. conceptualized the project, analyzed the results performing all the in silico work, supervised  
20 experiments except for the sequencing as well as the overall project execution and prepared the  
21 manuscript;

22 M. Hadzhieva ran the phage display experiments;

23 V.K. and M. T. ran the microarray experiments up to data processing, catalogued and maintained the  
24 seroteque;

25 V.S. supervised the phage display experiments, participated in the conceptualizing the paper and  
26 together with M. Heinz and L.A.M.Z. carried out the DNA isolation, PCR and sequencing;

27 E.H. supervised the sequencing task, participated in conceptualizing the project and the preparation of  
28 the manuscript;

29 S. P. and M.T. performed the data processing of microarray scans;

30 T.V. and T.K.E participated in conceptualizing the project, analysis of the results and the preparation of  
31 the manuscript;

- 1 D.F. was responsible for the patient selection, informed consent, ethics committee protocol preparation,
- 2 blood collection and serum preparation.

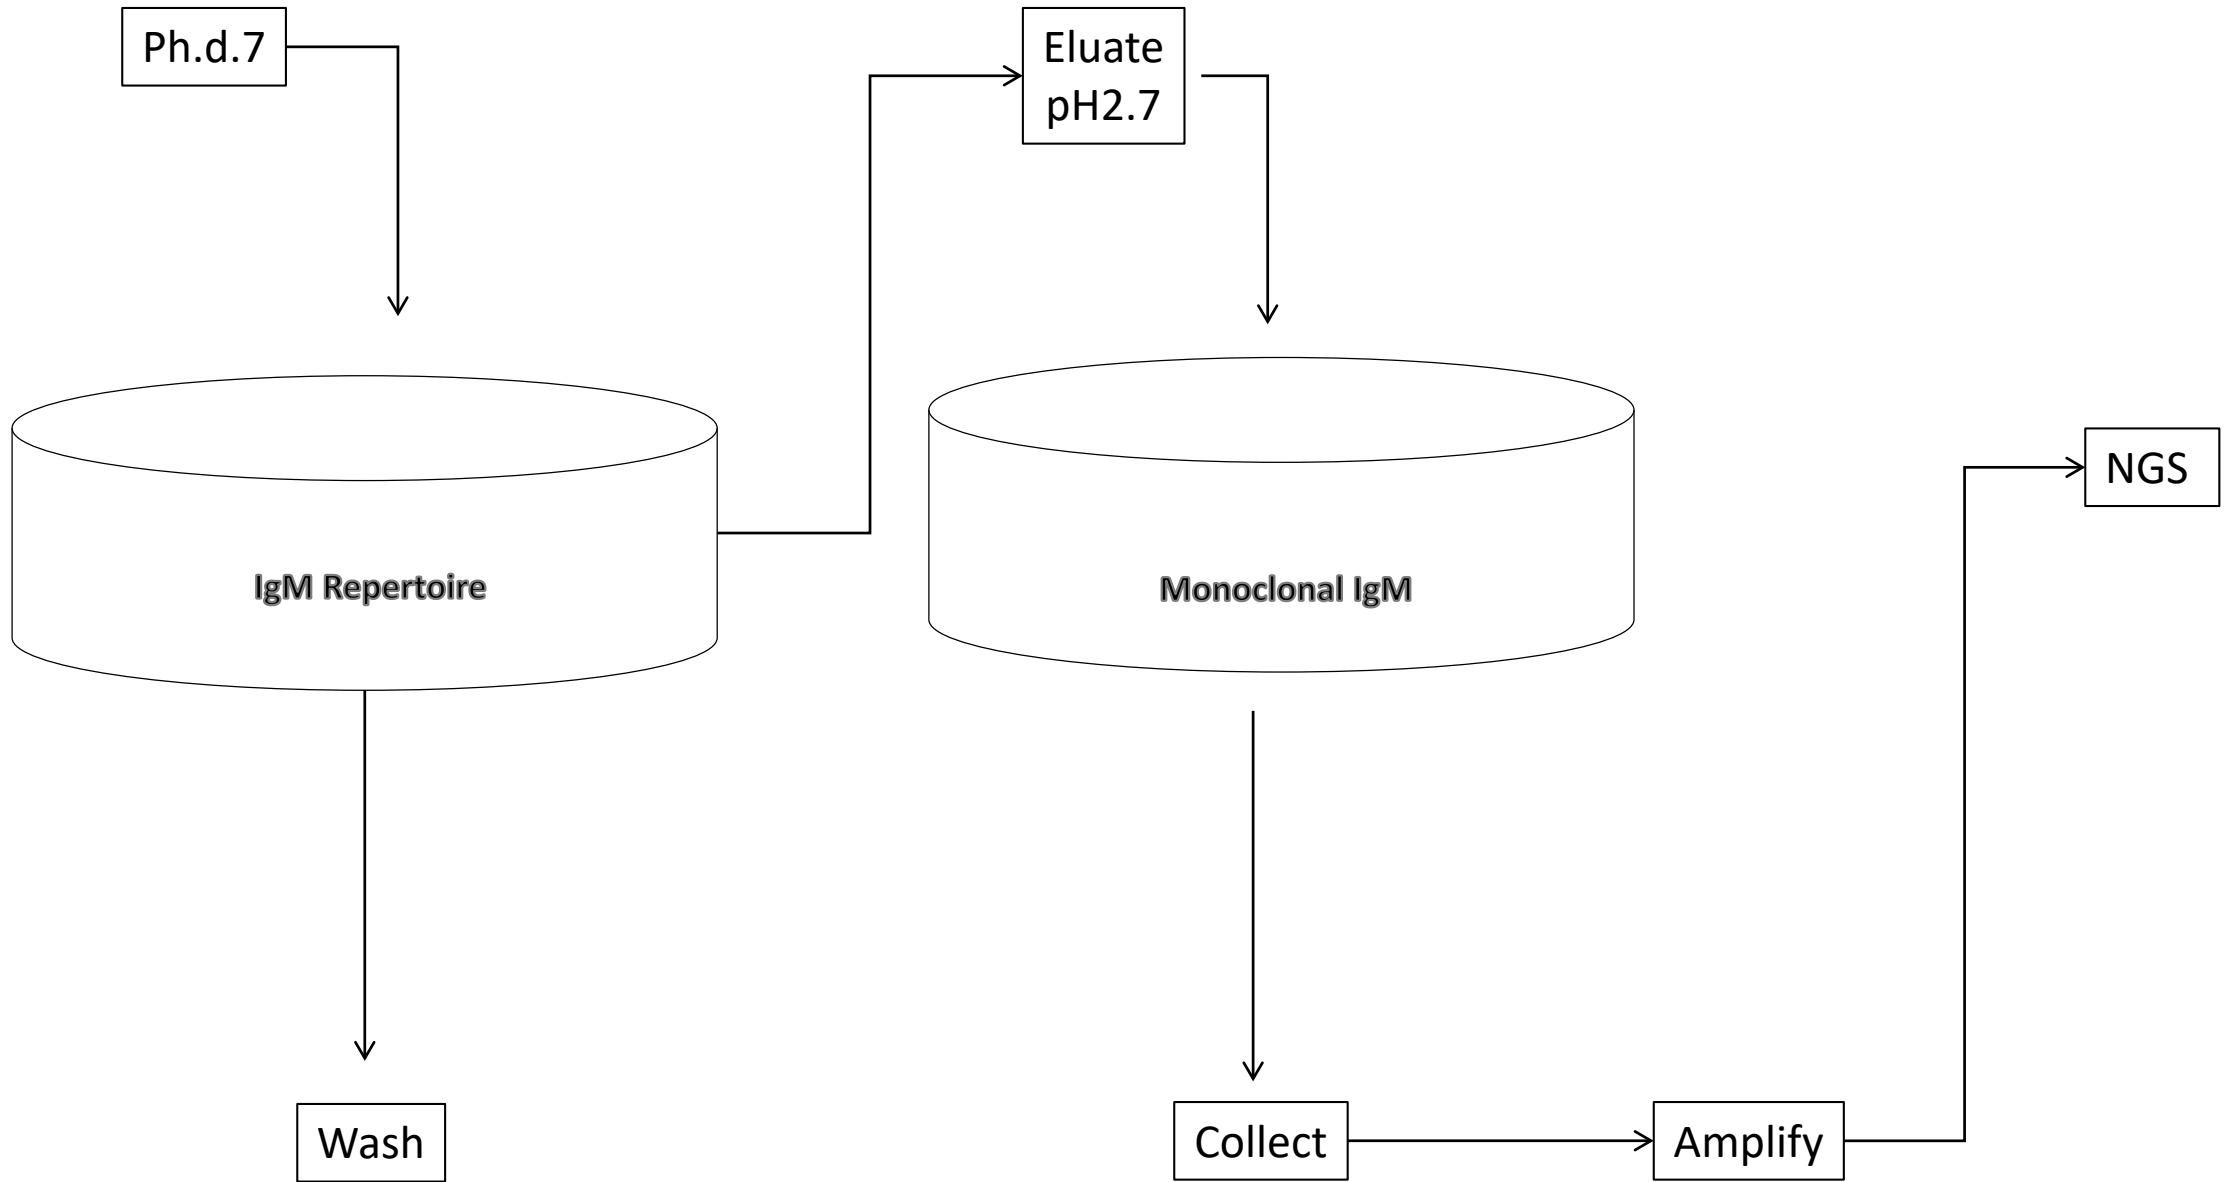

Fig.1

Fig. 2

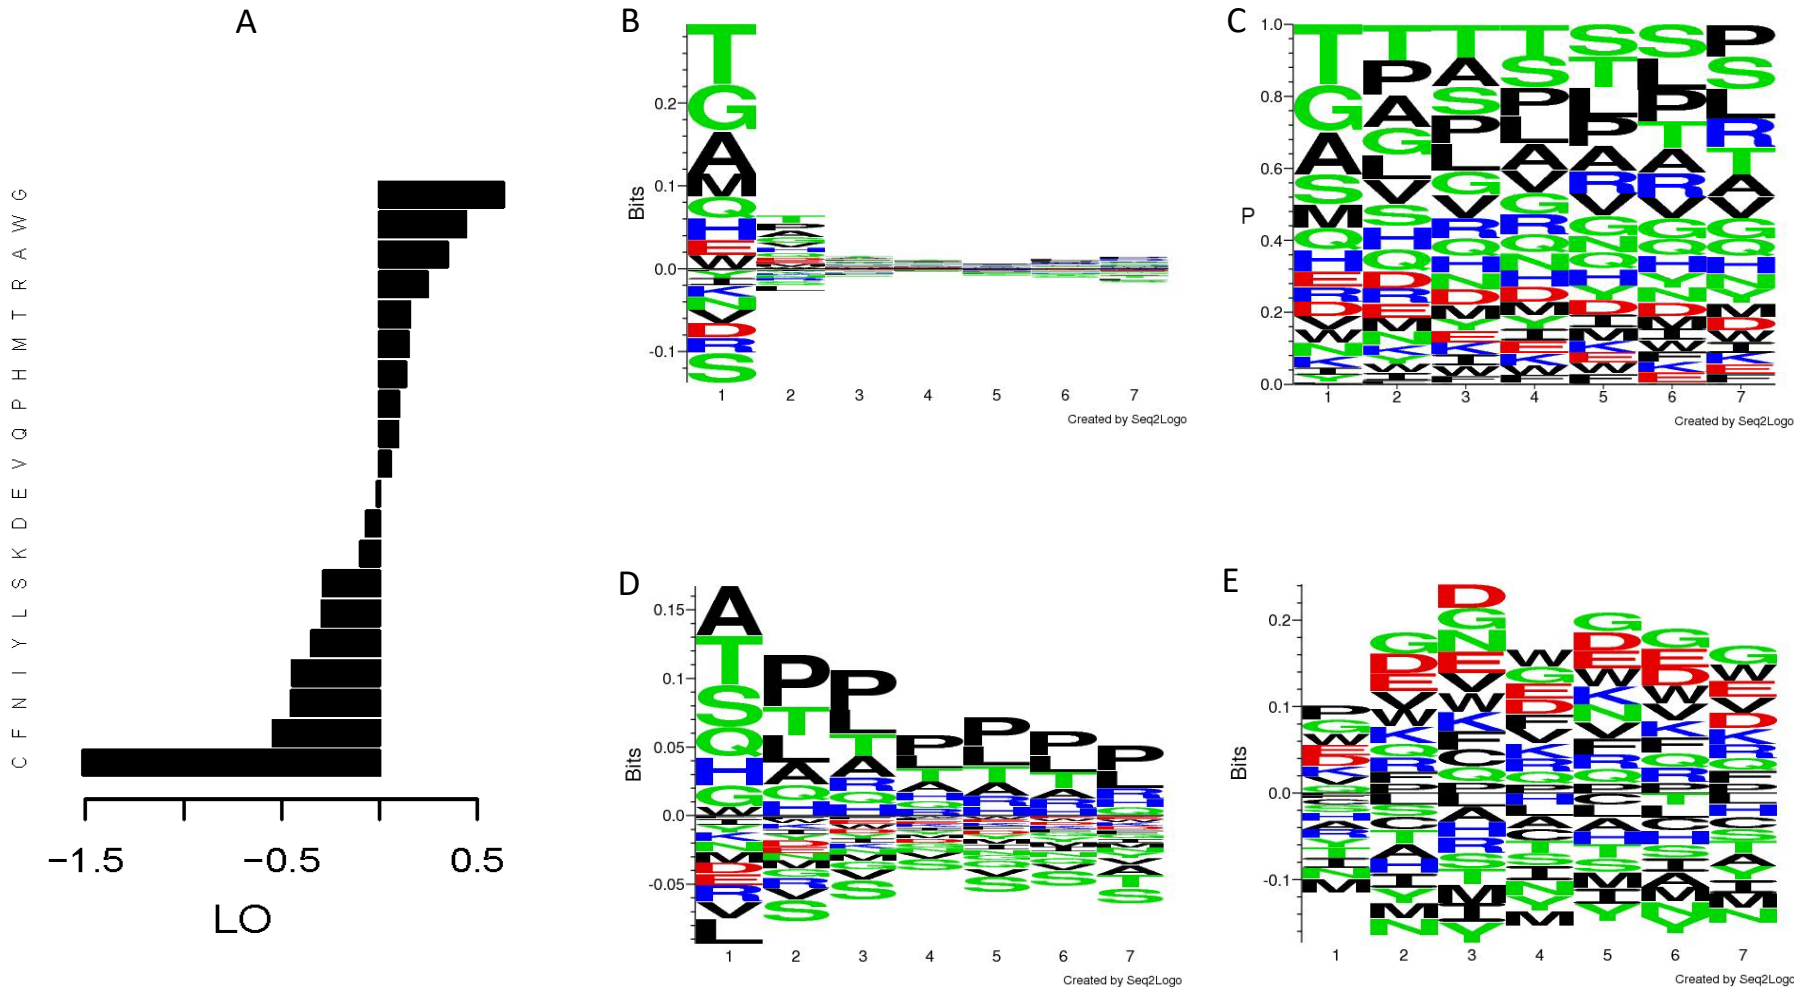

Fig. 3

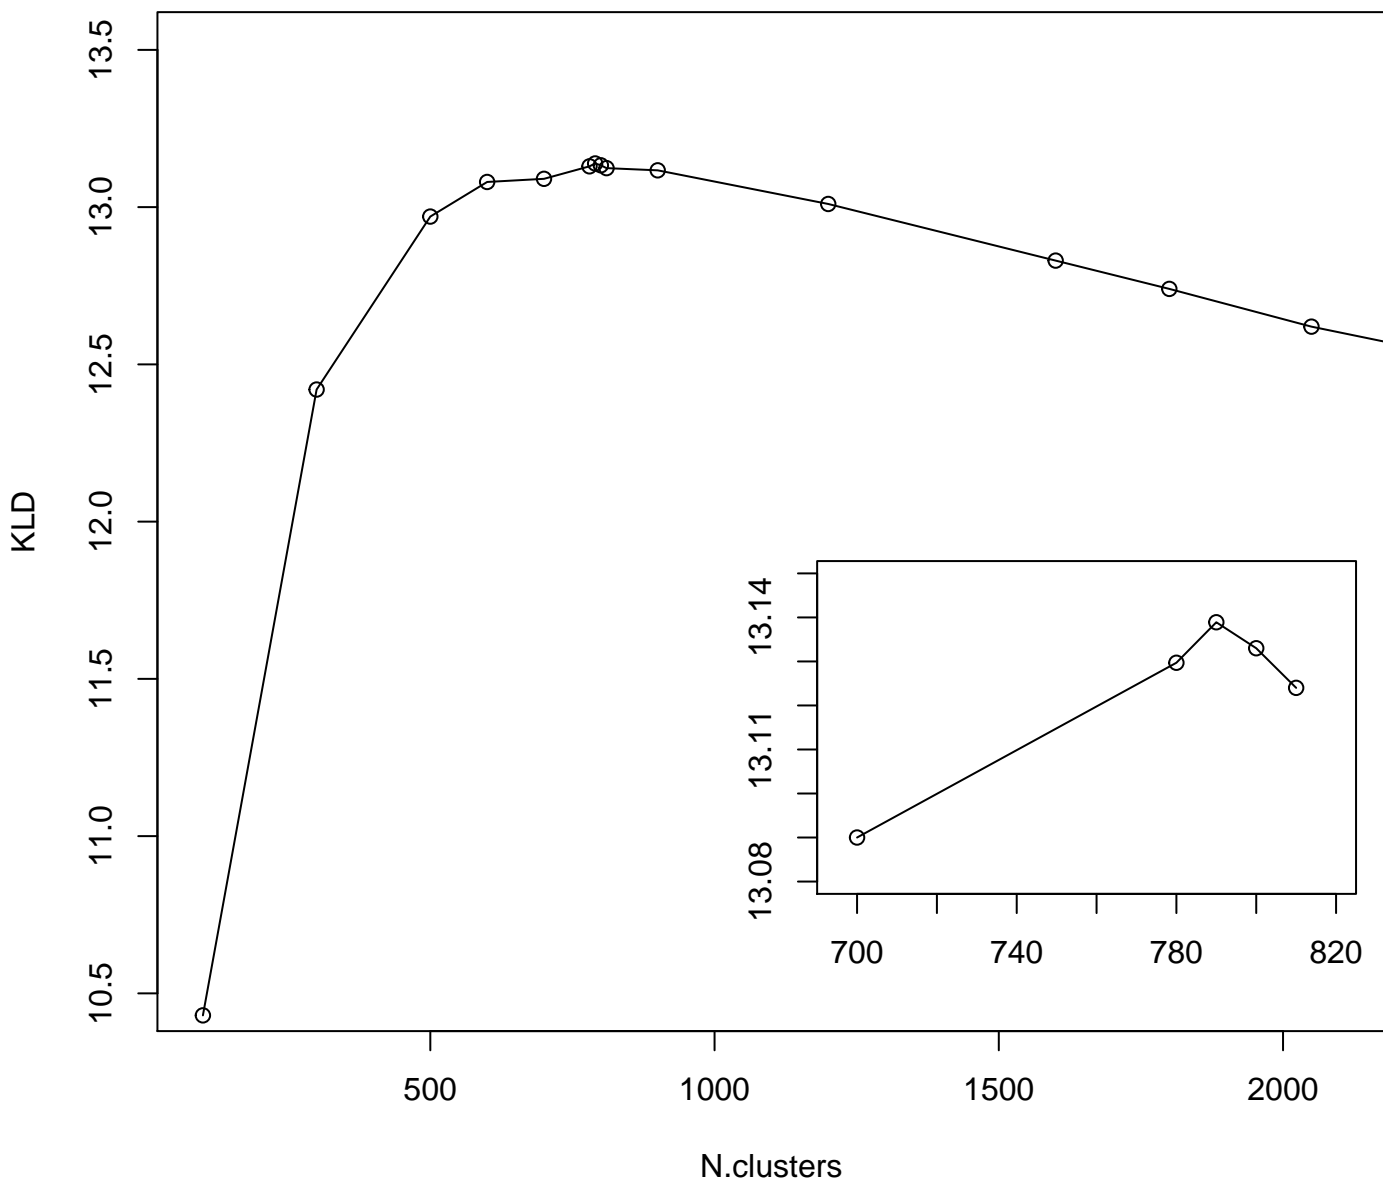

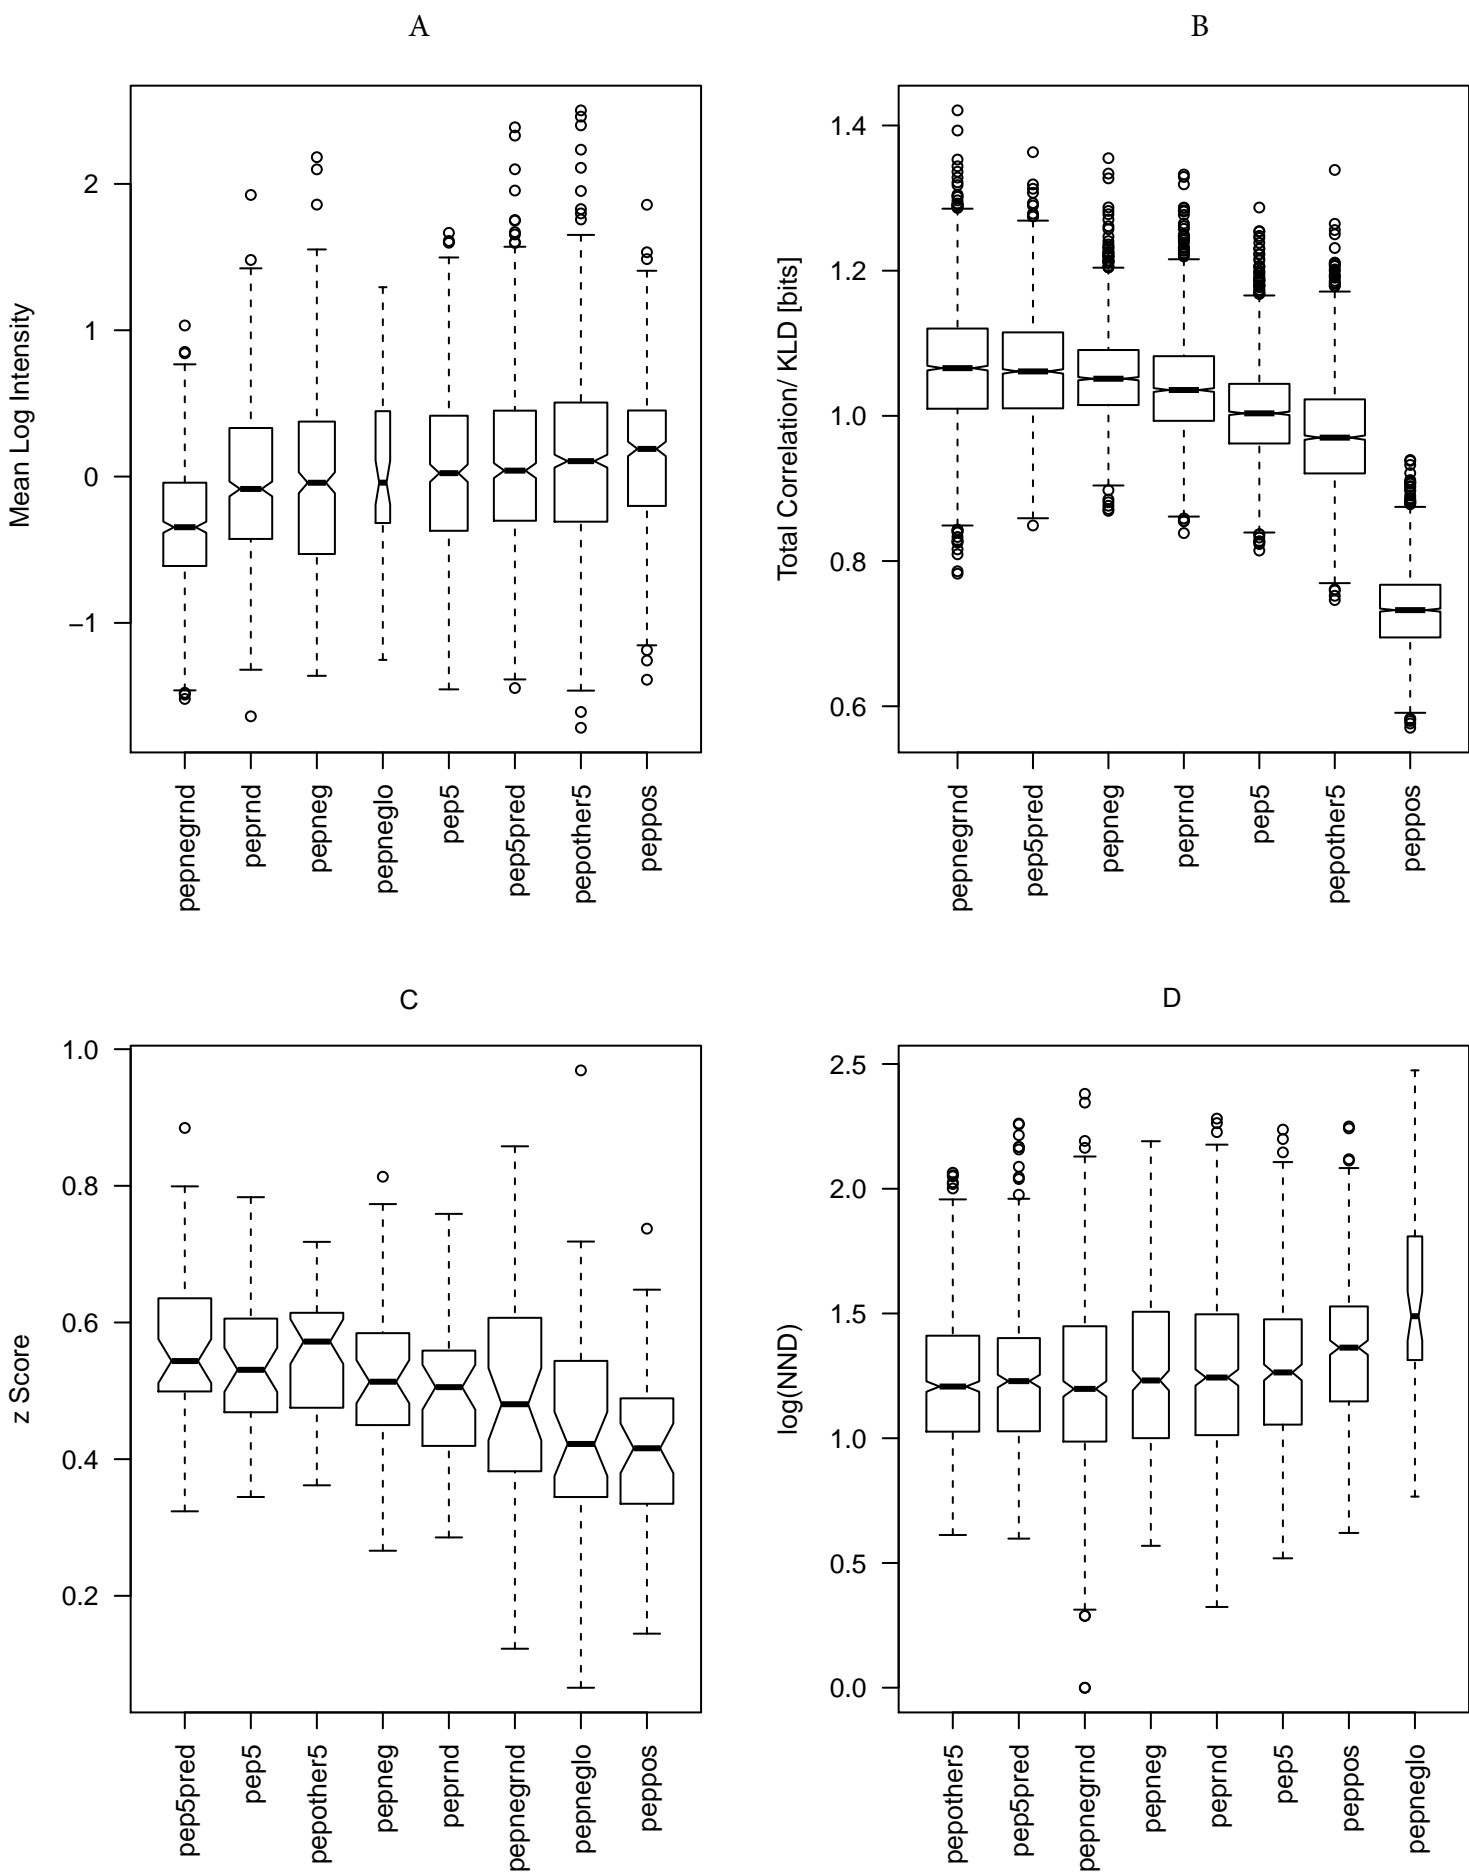



# Selected Mimotopes with the Optimized Library

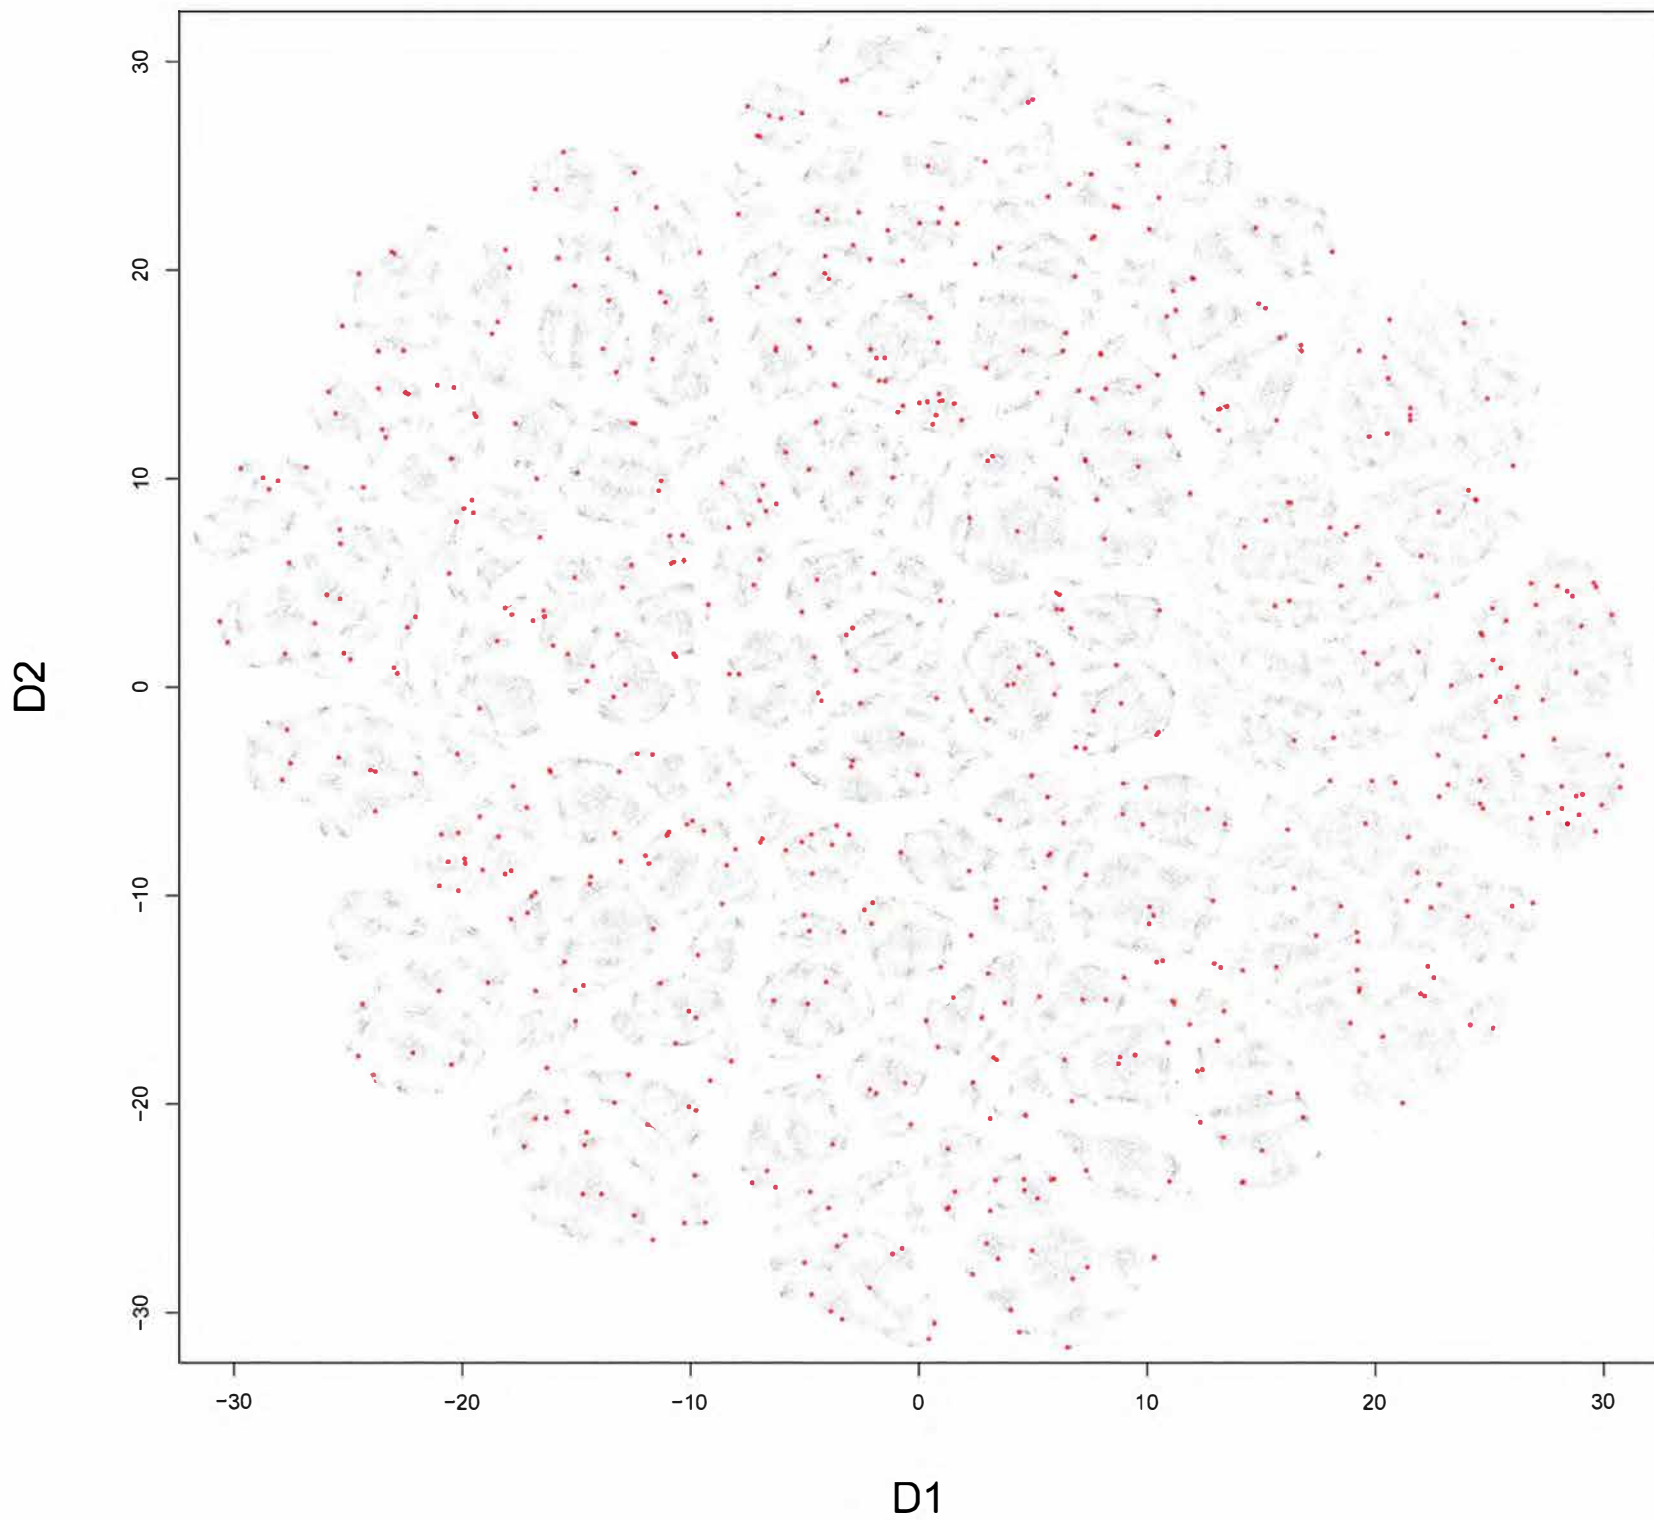

Fig. 5

# Mixture of Selected Mimotopes and Random Peptides

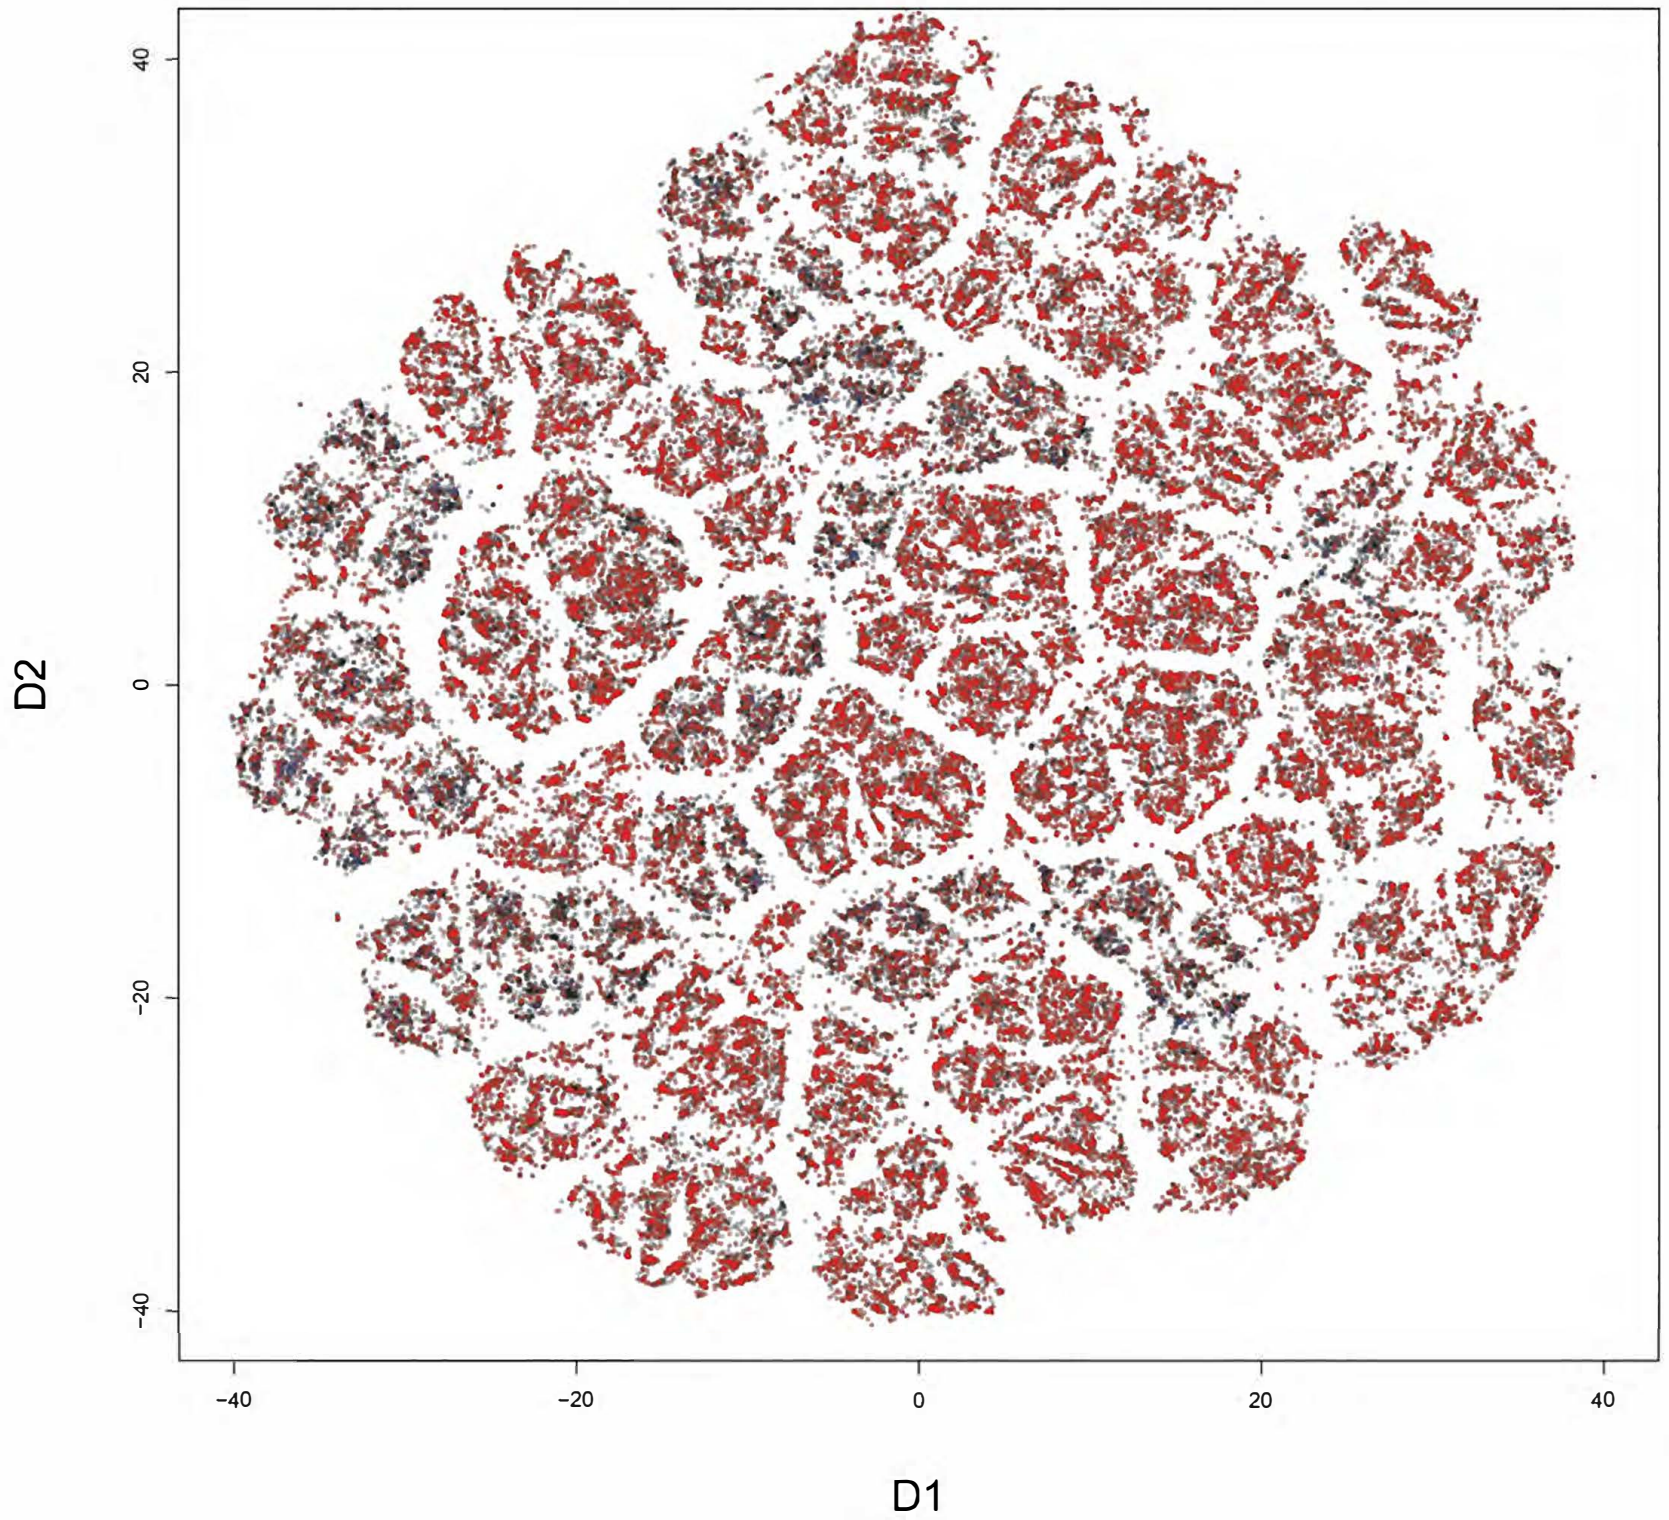

Fig. 6

## Training

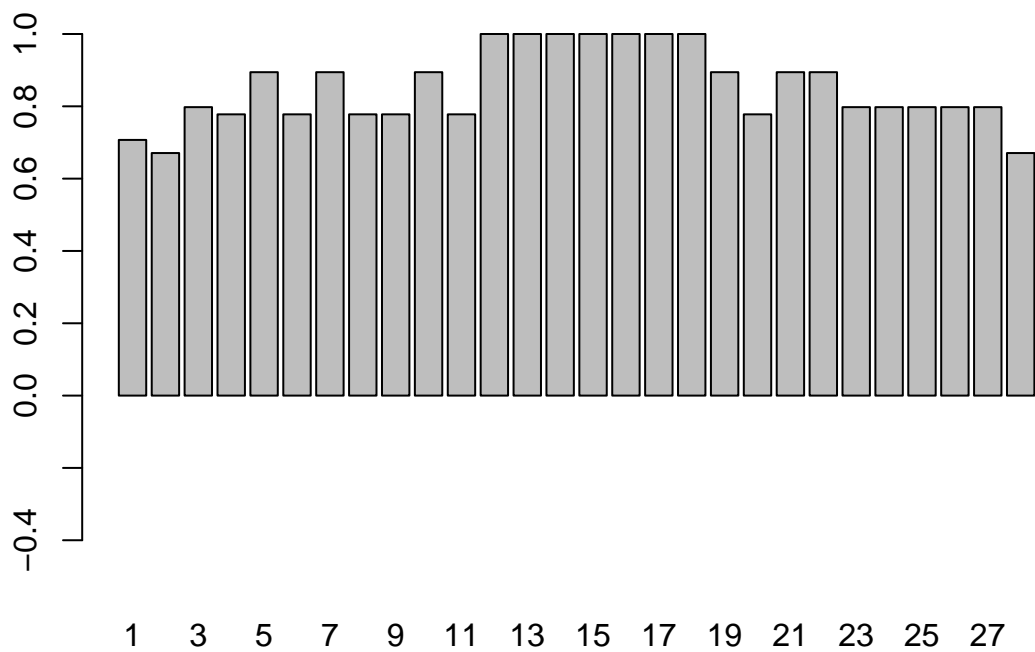

## Validation

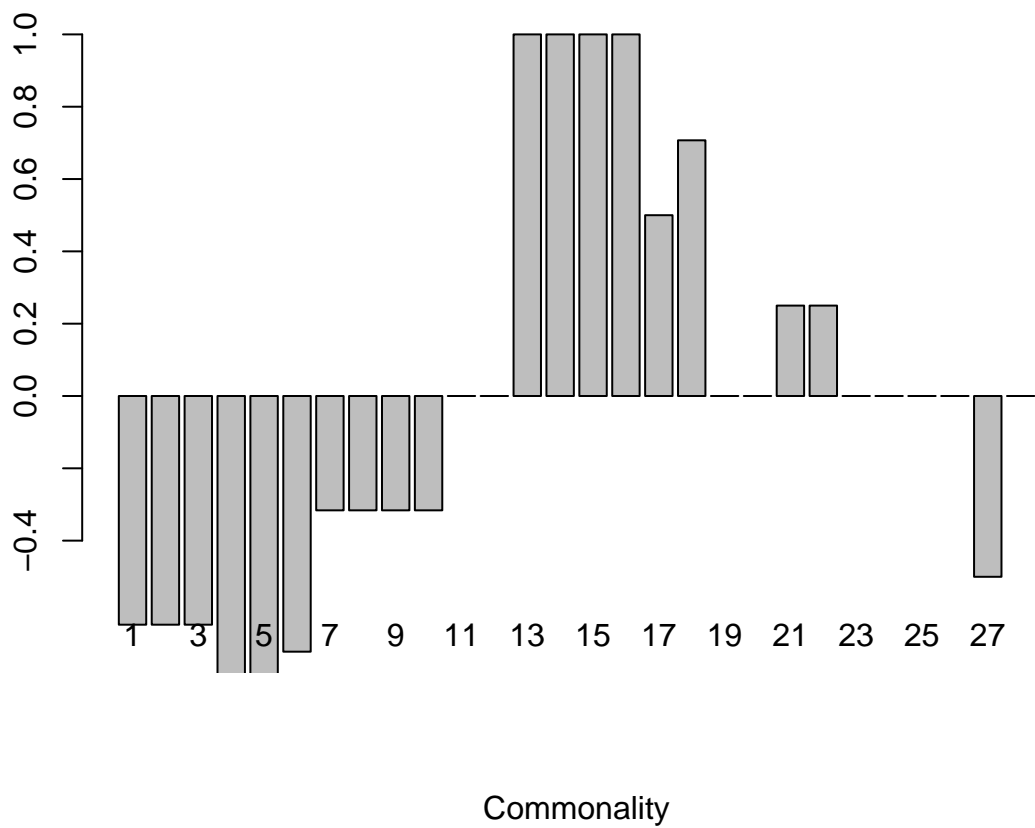

Commonality

Fig. 8

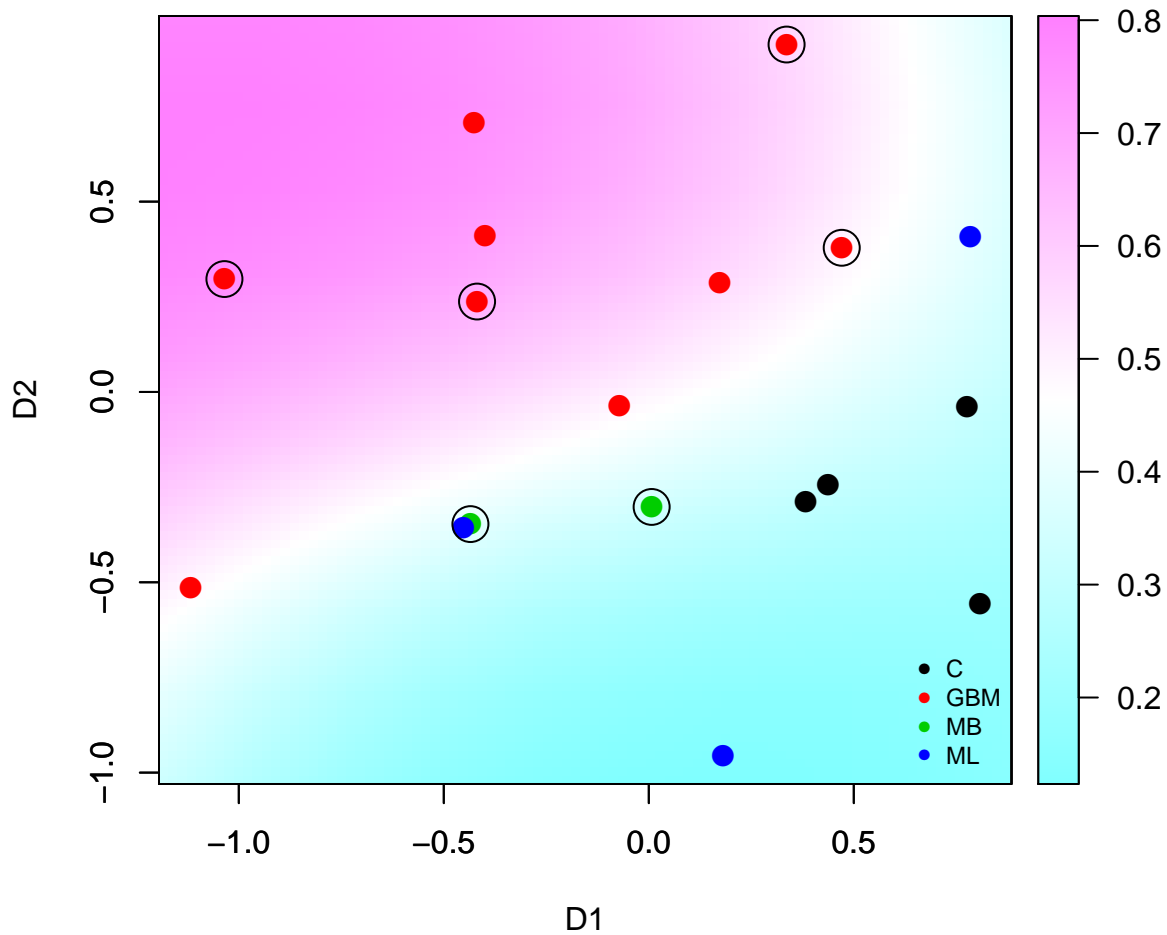

Source: https://www.biorxiv.org/content/10.1101/308973v6.full.pdf
